# Supplementary material for: AtSNP_TATAdb: Candidate Molecular Markers of Plant Advantages Related to Single Nucleotide Polymorphisms within Proximal Promoters of Arabidopsis thaliana L
Source: MDPI journal article supplement (doi:10.3390/ijms25010607), 2024-01-03
Supplement: s1 [file s1]

# AtSNP\_TATAdb: Candidate Molecular Markers of Plant Advantages Related to Single Nucleotide Polymorphisms within Proximal Promoters of *Arabidopsis thaliana* L.

Anton Bogomolov<sup>1</sup>, Karina Zolotareva<sup>1</sup>, Sergey Filonov<sup>1,2</sup>, Irina Chadaeva<sup>1</sup>, Dmitry Rasskazov<sup>1</sup>, Ekaterina Sharypova<sup>1</sup>, Nikolay Podkolodnyy<sup>1,3</sup>, Petr Ponomarenko<sup>1</sup>, Ludmila Savinkova<sup>1</sup>, Natalya Tverdokhleba<sup>1</sup>, Bato Khandaev<sup>1,2</sup>, Ekaterina Kondratyuk<sup>1,4</sup>, Olga Podkolodnaya<sup>1</sup>, Elena Zemlyanskaya<sup>1,2</sup>, Nikolay A. Kolchanov<sup>1,2</sup> and Mikhail Ponomarenko<sup>1,\*</sup>

<sup>1</sup> Institute of Cytology and Genetics, Novosibirsk 630090, Russia

<sup>2</sup> Natural Science Department, Novosibirsk State University, Novosibirsk 630090, Russia

<sup>3</sup> Institute of Computational Mathematics and Mathematical Geophysics, Novosibirsk 630090, Russia

<sup>4</sup> Siberian Federal Scientific Centre of Agro-BioTechnologies of the Russian Academy of Sciences, Krasnoobsk, Novosibirsk region, Russia

\* Correspondence: pon@bionet.nsc.ru. Tel.: +7 (383) 363-4963 ext. 1311 (M.P.)

## Section S1. Plant\_SNP\_TATA\_Z-tester as a Web service, automatic mode which was used to uniformly estimate how promoter-proximal SNPs can alter *Arabidopsis* gene expression in this work

In this work we used an automatic mode of our previously developed Web-service Plant\_SNP\_TATA\_Z-tester [24] shown in Figures 1 and 5 (hereinafter, see the main text), the input data of which is two DNA sequences 90 bp long located just upstream the transcription start site (TSS,  $s^{wt_0} = s^{min_0}$ , where:  $s_i \in \{a, c, g, t\}$ ) of the proximal promoter analyzed of the *Arabidopsis thaliana* gene under study, such as:  $S_{wt} = \{s^{wt_{-90}} \dots s^{wt_i} \dots s^{wt_{-1}}\}$  and  $S_m = \{s^{min_{-90}} \dots s^{min_i} \dots s^{min_{-1}}\}$  corresponding to ancestral (wt) or minor (min) allele, respectively, of a given SNP examined.

The result (i.e., output data) of this analysis is two quantitative sequence-based estimates *in silico* for two “ $-\ln[K_D \text{AtTBP}(S_i)]$ ”-values expressed on the natural-logarithm scale (ln-units), which evaluate the TBP-promoter affinity upon each DNA sequences ( $S_i$ ) independently from one another [24], such as:

$$-\ln[K_D; \text{AtTBP}(S_i)] = 7.0 - 0.6 \ln(K_D; \text{HsTBP}(S_i)). \quad (\text{S1})$$

where 7.0 and 0.6 are linear regression coefficients, which were optimized by us in our previous article [24] using unique data from experimental measurements of the effect of the same mutations in the same promoter on the transcriptional activity of this promoter under the same conditions *ex vivo* using TPB extracted from either *Arabidopsis thaliana* TBP (AtTBP) or human TBP (HsTBP) [32];  $K_D; \text{AtTBP}$  and  $K_D; \text{HsTBP}$  are the equilibrium dissociation constant estimation expressed in moles per liter, M, of the TBP extracted from either human or *Arabidopsis thaliana* for the considered alleles (i.e.,  $S_i$  as  $S_{wt}$  or  $S_m$ ) of the *Arabidopsis thaliana* promoter upon their known DNA sequences of 90 bp in length.

First of all, within Eq. S1,  $-\ln(K_D; \text{HsTBP}(S_i))$  is calculated using our three-step model [25] of the TBP-promoter binding (i.e., TBP slides along DNA [26]  $\leftrightarrow$  molecular co-recognition between TBP and TBP-site met [27]  $\leftrightarrow$  DNA-bend stabilizes TBP-promoter complex [28]) which is proven experimentally [29], as follows:

$$-\ln[K_D; \text{HsTBP}(S_i)] = 10.9 - 0.2 \{ \ln[K_{\text{SLIDE}}; \text{HsTBP}(S_i)] K_{\text{STOP}}; \text{HsTBP}(S_i) K_{\text{BEND}}; \text{HsTBP}(S_i) \}, \quad (\text{S2})$$

where; 10.9 (ln-units) seems to numerically match nonspecific TBP–DNA affinity (10  $\mu\text{M}$ ) as measured independently [33]; 0.2 is a stoichiometric coefficient of the three-step TBP–promoter binding, as determined elsewhere by means of the difference in the length of the TBP consensus site and the region of TBP sliding along DNA [25].

Besides, within Eq. S2,  $-\ln[K_{\text{STOP}}(S_{\bullet})]$  is an estimation of the equilibrium dissociation constant of the mutual recognition between TBP and the most probable TBP-site encountered at the second step among the three steps in question:

$$-\ln[K_{\text{STOP}}; HsTBP(S_{\bullet})] = \text{MAX}_{-90 \leq i \leq 20; k \in \{-1; +1\}} \{ \sum_{i-1 \leq j \leq i+13} w\{i, s_{\bullet j; k}\}, \quad (\text{S3})$$

where  $w\{i, s_{\bullet j}\}$  is Bucher's weight of nucleotide  $s_{\bullet j}$  at the  $j$ th position of the TBP-site [6];  $k$  is an indicator of either a direct (+1) or complementary (-1) strand of the double-stranded B-helical DNA of the promoter under study.;  $\text{MAX}(\zeta)$  is the highest  $\zeta$ -value observed.

Additionally, in Eq. S2,  $-\ln[K_{\text{SLIDE}}; HsTBP(S_{\bullet})]$  is an estimate of the equilibrium dissociation constant of an interaction between TBP and the promoter DNA during their sliding one over the other at the first step among the three within this bioinformatics model, as:

$$-\ln[K_{\text{SLIDE}}; HsTBP(S_{\bullet})] = \text{MEAN}_{[\xi - 7; \xi + 19]; k \in \{-1; +1\}} (35.1\mu + 0.8[\text{TA}]), \quad (\text{S3})$$

where  $\xi$  is the position of the most probable TBP-site according to Bucher's criterion [6] (i.e., Eq. S3); the  $\mu$  value of the minor-groove width of the B-helical DNA at this site's center was determined elsewhere [34];  $[\text{TA}]$  is the concentration of dinucleotide TA; 0.8 and 35.1 are linear regression coefficients [35].

Finally, in Eq. S2,  $-\ln[K_{\text{BEND}}; HsTBP(S_{\bullet})]$  is an estimation of the equilibrium dissociation constant of intermediate short-lived complexes between TBP and each of two DNA strands of the TBP-site separately from one another during DNA melting leading to the bend that fixes the TBP-promoter complex [28] at the last step of their binding, as follows:

$$-\ln[K_{\text{BEND}}; HsTBP(S_{\bullet})] = \text{MEAN}_{[\xi - 7; \xi + 19]; k \in \{-1; +1\}} (0.9[\text{TA}, \text{AA}, \text{TG}, \text{AG}] + 2.5[\text{TA}, \text{TC}, \text{TG}] + 14.4), \quad (\text{S4})$$

where 0.9, 2.5, and 14.4 are linear regression coefficients [35].

After that, examining all the possible mutations,  $s_{\bullet j} \rightarrow \varphi$ , at each  $j$ th position among 26 positions of the most probable TBP-site according to Eq. S3, our automatic mode of Web-service Plant\_SNP\_TATA\_Z-tester [24] estimated standard error of the mean SEM $\bullet$  of the  $-\ln[K_{D; AtTBP}(S_{\bullet})]$  values calculated using Eq. S1, as:

$$\text{SEM}_{\bullet} = \{ (\sum_{\xi-7 \leq j \leq \xi+19} \sum_{\{a,c,g,t\}} \ln[K_{D; AtTBP}(s_{\bullet \xi-7} \dots s_{j-1} \varphi s_{j+1} \dots s_{\bullet \xi+19}) / K_{D; AtTBP}(s_{\bullet \xi-7} \dots s_{j-1} s_j s_{j+1} \dots s_{\bullet \xi+19})]^2) / ((3*26)(3*26 - 1)) \}^{1/2}. \quad (\text{S6})$$

Using both sequences  $S_{\text{wt}}$  and  $S_{\text{min}}$  and Eqs. S1 - S5, this toolbox found two paired value sets  $\{-\ln[K_D(S_{\text{wt}})] \pm \text{SEM}_{\text{wt}}\}$  and  $\{-\ln[K_D(S_{\text{min}})] \pm \text{SEM}_{\text{min}}\}$ , respectively, which are necessary for Fisher's Z-score [36], for instance:

$$Z = \text{abs}[\ln[K_{D; AtTBP}(S_{\text{wt}}) / K_{D; AtTBP}(S_{\text{min}})]] / [\text{SEM}_{\text{wt}}^2 + \text{SEM}_{\text{min}}^2]^{1/2}. \quad (\text{S7})$$

Eventually, with the help of the R software [36], using this Z-value, our Web-service Plant\_SNP\_TATA\_Z-tester [24] found a  $p$  value of the probability of the tested hypothesis " $H_0: K_{D; AtTBP}(S_{\text{wt}}) \neq K_{D; AtTBP}(S_{\text{min}})$ " so that if it is statistical significant ( $p > 0.95$ ), it made the decision:

$$\begin{aligned} \text{IF} & \quad \{\text{INEQUALITY } "K_{D; AtTBP}(S_{\text{min}}) < K_{D; AtTBP}(S_{\text{wt}})" \text{ is statistically significant} \}, \\ \text{THEN} & \quad \{\text{DECISION is "the minor allele of the gene considered is overexpressed relative to the ancestral one"}\}; \\ \text{ELSE} & \quad \{\text{IF} \quad \{\text{INEQUALITY } "K_{D; AtTBP}(S_{\text{min}}) > K_{D; AtTBP}(S_{\text{wt}})" \text{ is statistically significant}\}, \\ & \quad \text{THEN} \quad \{\text{DECISION is "the minor allele of this gene is underexpressed relative to the ancestral one"}\}, \\ \text{OTHERWISE} & \quad \{\text{DECISION is "the expression change of this gene is insignificant"}\}. \end{aligned} \quad (\text{S8})$$

Dialogue mode of our Web service Plant\_SNP\_TATA\_Z-tester [24] presents this decision (Eq. S8) in the "Decision" line of the "Result" textbox, while all the intermediate results are in the other lines of this textbox, as readers can see in Figure 5.

**Table S1.** Candidate SNP markers within the 90-bp proximal promoters of the *Arabidopsis thaliana* genes taken as an example of filling out the AIsNP\_TATAdb database, created for the first time in this work.

| # | <i>A. thaliana</i> gene<br>(Entrez ID [37];<br>TAIR ID [38]) | Candidate SNP marker              |                 |           |                | K <sub>d</sub> , nM, MEAN ± SEM, <i>in silico</i> |   |       |                  |   | Hand-curated annotation using the PubMed database [39] |                                                                                                                                                                                                                                                                                                                |  |  |   |
|---|--------------------------------------------------------------|-----------------------------------|-----------------|-----------|----------------|---------------------------------------------------|---|-------|------------------|---|--------------------------------------------------------|----------------------------------------------------------------------------------------------------------------------------------------------------------------------------------------------------------------------------------------------------------------------------------------------------------------|--|--|---|
|   |                                                              | TAIR SNP ID [38]: minor<br>allele | 5' flank, 10 bp | WT<br>min | 3 flank, 10 bp | WT<br>min                                         | Δ | Z     | p                | Q | economically<br>valuable traits                        | Effect on this trait ("↑" as improved; "↓" as impaired) within plant<br>breeding models using <i>Arabidopsis thaliana</i> [Ref]                                                                                                                                                                                |  |  | Y |
| 1 | <i>ARF1</i><br>(842268;<br>AT1G59750)                        | ENSVATH01403825:A                 | taaaaaaaaa      | T<br>A    | ataaagagga     | 2.84±0.18<br>5.29±0.24                            | ↓ | 16.29 | 10 <sup>-6</sup> | A | somatic<br>embryogenic<br>response                     | within plant somatic embryogenesis models using <i>Arabidopsis thaliana</i><br>(ecotype Columbia) treated with auxin and, next, tested with qPCR:<br>ARF1 deficit is a molecular marker for somatic embryogenesis as well as<br>mutational ARF1-downregulation can impair somatic embryogenic<br>response [40] |  |  | V |
|   |                                                              | ENSVATH01403824:T                 | aattaaaaaaaa    | A<br>T    | atataaagag     | 2.84±0.18<br>1.65±0.11                            | ↑ | 11.94 | 10 <sup>-6</sup> | A | leaf<br>senescence,<br>chlorophyll<br>content          | within plant development models using <i>Cymbidium goeringii</i> as an<br>economically important genus of flowering orchids cultivated in China:<br>ARF1 overexpression in leaves is a molecular marker for both leaf<br>senescence and decreased chlorophyll content [41]                                     |  |  | V |
| 2 | <i>ARF3</i><br>(817014;<br>AT2G24765)                        | ENSVATH05582399:A                 | gagctgataa      | T<br>A    | atttaggccc     | 4.05±0.27<br>6.11±0.32                            | ↓ | 9.77  | 10 <sup>-6</sup> | A | somatic<br>embryogenic<br>response                     | within plant somatic embryogenesis models using <i>Arabidopsis thaliana</i><br>(ecotype Columbia) treated with auxin and, next, tested with qPCR:<br>ARF3 deficit is a molecular marker for somatic embryogenesis as well as<br>mutational ARF1-downregulation can impair somatic embryogenic<br>response [40] |  |  | V |
| 3 | <i>ARF6</i><br>(839913;<br>AT1G30330)                        | tmp_1_10691073_T_A:T              | accataacgt      | A<br>T    | ttattaaaac     | 3.34±0.19<br>3.65±0.19                            | ↓ | 2.27  | 0.05             | D | lower buds<br>opening                                  | within plant development models using <i>arf6 arf8</i> double loss-of-function<br>mutant <i>Arabidopsis</i> lines: arrested flowers just before wild-type flower buds<br>normally open [42]                                                                                                                    |  |  | V |
|   |                                                              | ENSVATH04674378:A                 | gggttcgggt      | C<br>A    | aaaaaacagc     | 7.94±0.38<br>5.36±0.29                            | ↑ | 10.91 | 10 <sup>-6</sup> | A | somatic<br>embryogenic<br>response                     | within plant somatic embryogenesis models using <i>Arabidopsis thaliana</i><br>(ecotype Columbia) treated with auxin and, next, tested with qPCR: ARF6<br>excess is a molecular marker for somatic embryogenesis [40]                                                                                          |  |  | Λ |
|   |                                                              | ENSVATH12375115:A                 | tgctttagaa      | G<br>A    | aaaatcaaag     | 7.94±0.38<br>6.86±0.35                            | ↑ | 4.20  | 10 <sup>-3</sup> | B |                                                        |                                                                                                                                                                                                                                                                                                                |  |  |   |
| 4 | <i>ARF8</i><br>(833672;<br>AT5G37020)                        | ENSVATH14527658:T                 | tgacacatat      | C<br>T    | tttttctctc     | 5.70±0.34<br>6.22±0.37                            | ↓ | 2.08  | 0.05             | D | lower buds<br>opening                                  | within plant development models using <i>arf6 arf8</i> double loss-of-function<br>mutant <i>Arabidopsis</i> lines: arrested flowers just before wild-type flower<br>buds normally open [42]                                                                                                                    |  |  | V |
|   |                                                              | tmp_5_14629589_T_A:A              | ctctgacac       | T<br>A    | atctttttct     | 5.70±0.34<br>11.21±0.52                           | ↑ | 17.93 | 10 <sup>-6</sup> | A |                                                        |                                                                                                                                                                                                                                                                                                                |  |  |   |
|   |                                                              | ENSVATH12056628:A                 | aagtgactct      | G<br>A    | gtactgacac     | 5.96±0.52<br>4.42±0.32                            | ↑ | 5.28  | 10 <sup>-6</sup> | A | somatic<br>embryogenic<br>response                     | within plant somatic embryogenesis models using <i>Arabidopsis thaliana</i><br>(ecotype Columbia) treated with auxin and, next, tested with qPCR:<br>ARF8 excess is a molecular marker for somatic embryogenesis [40]                                                                                          |  |  | Λ |
|   |                                                              | tmp_5_14629402_C_A:A              | caccacctct      | C<br>A    | ataattctcg     | 5.96±0.52<br>4.49±0.29                            | ↑ | 5.26  | 10 <sup>-6</sup> | A |                                                        |                                                                                                                                                                                                                                                                                                                |  |  |   |
| 5 | <i>ARF10</i><br>(817382;<br>AT2G28350)                       | ENSVATH13446932:A                 | ctcttcttct      | T<br>A    | ctacgatctg     | 4.86±0.35<br>3.70±0.23                            | ↑ | 5.75  | 10 <sup>-6</sup> | A | somatic<br>embryogenic<br>response                     | within plant somatic embryogenesis models using <i>Arabidopsis thaliana</i><br>(ecotype Columbia) treated with auxin and, next, tested with qPCR: ARF10<br>excess is a molecular marker for somatic embryogenesis [40]                                                                                         |  |  | Λ |
|   |                                                              | tmp_2_12113993_C_T:T              | ctgattatag      | C<br>T    | atctctctct     | 4.86±0.35<br>2.81±0.21                            | ↑ | 10.56 | 10 <sup>-6</sup> | A |                                                        |                                                                                                                                                                                                                                                                                                                |  |  |   |

**Note:** Alleles: WT, ancestral; min, minor; K<sub>d</sub>, dissociation constant of the TBP-promoter complex; Z and p, Fisher's Z-test and its statistical significance estimate; ρ, heuristic rank of candidate SNP markers from the "best" (A) to the "worst" (E); Δ, expression change: "↓" as deficit, "↑" as excess

**Table S1.** Cont.

| #  | <i>A. thaliana</i> gene<br>(Entrez ID [37];<br>TAIR ID [38]) | Candidate SNP marker              |                 |           | K <sub>D</sub> , nM, MEAN ± SEM, <i>in silico</i> |                        |   |       |                  | Hand-curated annotation using the PubMed database [39] |                                                                              |                                                                                                                                                                                                                                                                                                                                                                                                                     |   | Y |
|----|--------------------------------------------------------------|-----------------------------------|-----------------|-----------|---------------------------------------------------|------------------------|---|-------|------------------|--------------------------------------------------------|------------------------------------------------------------------------------|---------------------------------------------------------------------------------------------------------------------------------------------------------------------------------------------------------------------------------------------------------------------------------------------------------------------------------------------------------------------------------------------------------------------|---|---|
|    |                                                              | TAIR SNP ID [38]: minor<br>allele | 5' flank, 10 bp | WT<br>min | 3 flank, 10 bp                                    | WT<br>min              | Δ | Z     | P                | Q                                                      | economically<br>valuable traits                                              | Effect on this trait ("Y": "A" as improved; "V" as impaired) within plant<br>breeding models using <i>Arabidopsis thaliana</i> [Ref]                                                                                                                                                                                                                                                                                |   |   |
| 6  | <i>ARF11</i><br>(819264;<br>AT2G46530)                       | tmp_2_19104613_T_C:C              | acacgtagtt      | T<br>C    | gaaagatgag                                        | 4.64±0.26<br>6.82±0.35 | ↓ | 10.12 | 10 <sup>-6</sup> | A                                                      | somatic<br>embryogenic<br>response                                           | within plant somatic embryogenesis models using <i>Arabidopsis thaliana</i> (ecotype Columbia) treated with auxin and, next, tested with qPCR: the activity of ARF11 transcripts were four-times less abundant in the somatic embryos-induced explants than in the freshly isolated explants as the most reduced in embryogenesis [40]                                                                              | V |   |
|    |                                                              | ENSVATH05729071:A                 | agtcaacatt      | T<br>A    | ttaactctaa                                        | 4.93±0.23<br>4.59±0.25 | ↑ | 1.98  | 0.05             | D                                                      | fast-growing<br>plants                                                       | within plant development models using poplar as an important fast-growing tree, transcriptomes of which have been profiled for several tissues: ARF11 overexpression in the 10th leaf position may be a molecular marker for fast-growing plants [43]                                                                                                                                                               | Λ |   |
|    |                                                              | tmp_2_19105101_T_A:A              | tcaacatttt      | T<br>A    | aactctaadc                                        | 4.93±0.23<br>4.10±0.21 | ↑ | 5.34  | 10 <sup>-6</sup> | A                                                      |                                                                              |                                                                                                                                                                                                                                                                                                                                                                                                                     |   |   |
| 7  | <i>ARF12</i><br>(840331;<br>AT1G34310)                       | tmp_1_12511576_C_T:A              | agagaaagtt      | G<br>A    | tataataatt                                        | 2.67±0.17<br>2.10±0.13 | ↑ | 5.26  | 10 <sup>-6</sup> | A                                                      | root shape,<br>root thickness,<br>root depth                                 | within plant development models using moroberekan with deep and thick roots and high root/shoot ratio in comparison with others rice lines either with numerous but shallow roots or with fewer but deeper roots than the latter ones: ARF12 excess may be a molecular marker for deep roots under drought, thick and deep roots under low nitrogen content as well as new thick and deep roots after trimming [44] | Λ |   |
| 9  | <i>ARF17</i><br>(844120;<br>AT1G77850)                       | ENSVATH01551471:G                 | attcagtgag      | T<br>G    | tttaataaca                                        | 3.14±0.20<br>3.49±0.27 |   | 2.12  | 0.05             | D                                                      |                                                                              |                                                                                                                                                                                                                                                                                                                                                                                                                     |   |   |
|    |                                                              | ENSVATH05163913:C                 | gagagatatt      | A<br>C    | aaagtttggt                                        | 3.38±0.18<br>3.96±0.25 | ↓ | 3.80  | 10 <sup>-3</sup> | B                                                      | male<br>sterility,<br>male<br>subfertility                                   | within plant fertility models using ARF17 loss-of-function <i>Arabidopsis thaliana</i> mutant (ecotype Columbia): male sterility [45]                                                                                                                                                                                                                                                                               | V |   |
|    |                                                              | ENSVATH05163913:T                 | gagagatatt      | A<br>T    | aaagtttggt                                        | 3.38±0.18<br>3.74±0.23 |   | 2.49  | 0.05             | D                                                      |                                                                              |                                                                                                                                                                                                                                                                                                                                                                                                                     |   |   |
|    |                                                              | ENSVATH01551472:T                 | gttttaataa      | C<br>T    | aataataaaa                                        | 3.14±0.20<br>2.78±0.17 | ↑ | 2.80  | 10 <sup>-2</sup> | C                                                      |                                                                              | in plant fertility models using <i>A. thaliana</i> (ecotype Columbia): ARF17 excess is a molecular marker for male sterility or subfertility [46]                                                                                                                                                                                                                                                                   | V |   |
| 10 | <i>ARF18</i><br>(825356;<br>AT3G61830)                       | ENSVATH00431478:G                 | gtgagtagta      | A<br>G    | aaggctgaga                                        | 3.39±0.20<br>4.61±0.32 | ↓ | 6.76  | 10 <sup>-6</sup> | A                                                      | shade<br>response,<br>stem growth,<br>leaf area                              | within plant shade avoidance models using ARF18-knockout <i>Arabidopsis thaliana</i> (ecotype Columbia): enhances auxin-dependent hypocotyl elongation accelerating stem growth and narrowing leaf area [47]                                                                                                                                                                                                        | Λ |   |
|    |                                                              | ENSVATH06357481:T                 | aaaaaaaaa       | G<br>T    | attttaagag                                        | 6.85±0.34<br>5.14±0.22 | ↑ | 8.75  | 10 <sup>-6</sup> | A                                                      |                                                                              | within plant shade avoidance models using ARF18-knockin <i>Arabidopsis thaliana</i> (ecotype Columbia): reduced shade responsiveness, shorted hypocotyl slowing down stem growth and expanding leaf area [47]                                                                                                                                                                                                       | V |   |
| 11 | <i>ARF19</i><br>(838505;<br>AT1G19220)                       | tmp_1_6633212_T_A:T               | aaaaagaaat      | A<br>T    | aaaaaggtgg                                        | 4.86±0.26<br>5.79±0.25 | ↓ | 5.15  | 10 <sup>-6</sup> | A                                                      | lateral root<br>formation                                                    | within plant development models using doubleARF7\ARF19-knockout <i>Arabidopsis thaliana</i> (ecotype Columbia): severely impaired in lateral root formation [48]                                                                                                                                                                                                                                                    | V |   |
|    |                                                              | ENSVATH04513629:A                 | taaaaagaaa      | T<br>A    | aaaaaggtg                                         | 4.86±0.26<br>6.19±0.36 |   | 6.19  | 10 <sup>-6</sup> | A                                                      |                                                                              |                                                                                                                                                                                                                                                                                                                                                                                                                     |   |   |
|    |                                                              | ENSVATH11518153:T                 | aagaaataaa      | A<br>T    | aaggtgggac                                        | 4.86±0.26<br>4.06±0.22 | ↑ | 4.83  | 10 <sup>-3</sup> | B                                                      | ethylene<br>response,<br>auxin<br>response,<br>phytohormo-<br>nes cross-talk | in plant phytohormone response models using <i>Arabidopsis thaliana</i> (ecotype Columbia) treated with either auxin or ethylene: ARF19 excess is a molecular marker of response to both auxin and ethylene as a cross-talk between these phytohormones complementing each other [49]                                                                                                                               | Λ |   |
|    |                                                              | tmp_1_6633217_C_A:T               | aaaataaaaa      | G<br>T    | aaataaaaaa                                        | 4.86±0.26<br>4.35±0.22 |   | 2.99  | 10 <sup>-2</sup> | C                                                      |                                                                              |                                                                                                                                                                                                                                                                                                                                                                                                                     |   |   |

Table S1. Cont.

| #  | <i>A. thaliana</i> gene<br>(Entrez ID [37];<br>TAIR ID [38]) | Candidate SNP marker              |                 |           | K <sub>D</sub> , nM, MEAN ± SEM, <i>in silico</i> |                        |   |       |                  | Hand-curated annotation using the PubMed database [39] |                                                                                                                                                                                                                                                                                                                                                                                                                                                         |                                                                                                                                                                                                                                                                                                                                                                      | γ |
|----|--------------------------------------------------------------|-----------------------------------|-----------------|-----------|---------------------------------------------------|------------------------|---|-------|------------------|--------------------------------------------------------|---------------------------------------------------------------------------------------------------------------------------------------------------------------------------------------------------------------------------------------------------------------------------------------------------------------------------------------------------------------------------------------------------------------------------------------------------------|----------------------------------------------------------------------------------------------------------------------------------------------------------------------------------------------------------------------------------------------------------------------------------------------------------------------------------------------------------------------|---|
|    |                                                              | TAIR SNP ID [38]: minor<br>allele | 5' flank, 10 bp | WT<br>min | 3 flank, 10 bp                                    | WT<br>min              | Δ | Z     | p                | Q                                                      | economically<br>valuable traits                                                                                                                                                                                                                                                                                                                                                                                                                         | Effect on this trait ("Y": "Λ" as improved; "V" as impaired) within plant<br>breeding models using <i>Arabidopsis thaliana</i> [Ref]                                                                                                                                                                                                                                 |   |
| 12 | ARF20<br>(840413;<br>AT1G35240)                              | ENSVATH14089833:A                 | gagaaagttt      | T<br>A    | ataataattg                                        | 2.88±0.17<br>3.93±0.21 | ↓ | 7.83  | 10 <sup>-6</sup> | A                                                      | bacterial effect,<br>auxin<br>accumulation<br>response, root<br>architecture,<br>root growth,<br>seedlings<br>development,<br>lateral roots,<br>roots hair, root<br>density                                                                                                                                                                                                                                                                             | within models of how bacteria can effect to plant root development<br>using <i>Arabidopsis thaliana</i> : <i>Lysinibacillus macroides</i> downregulated<br>ARF20 in seedlings that coincides with improved root both growth and<br>architecture by means of increased numbers of lateral roots, roots hair,<br>root density as a response to auxin accumulation [50] | Λ |
|    |                                                              | tmp_1_12930582_C_A:T              | aaggggagaaa     | G<br>T    | ttttataata                                        | 2.88±0.17<br>2.57±0.15 | ↑ | 2.71  | 10 <sup>-2</sup> | C                                                      | as a heuristic contrast to the only ARF20-related publication found about<br>the model of how bacteria can effect to plant root development using<br><i>Arabidopsis thaliana</i> , when <i>Lysinibacillus macroides</i> downregulated<br>ARF20, ARF20 upregulation might somehow impair seedlings root<br>development via defective root either growth or architecture by means of<br>decreased numbers of lateral roots, roots hair, root density [50] | V                                                                                                                                                                                                                                                                                                                                                                    |   |
| 13 | ARF22<br>(840341;<br>AT1G34390)                              | tmp_1_12555954_A_C:C              | aagttgtata      | A<br>C    | taattgttgg                                        | 2.67±0.15<br>3.07±0.24 | ↓ | 2.94  | 10 <sup>-2</sup> | C                                                      | nitrogen<br>deficiency<br>stress                                                                                                                                                                                                                                                                                                                                                                                                                        | within models of plant stress response using <i>Triticum turgidum subsp.</i><br><i>Durum</i> : ARF20 downregulation is a molecular marker in roots under<br>both chronic and short-term nitrogen deficiency stress [51]                                                                                                                                              | Λ |
|    |                                                              | ENSVATH12859519:C                 | gtataataat      | T<br>C    | gttgggataa                                        | 2.67±0.15<br>2.40±0.16 | ↑ | 2.38  | 0.05             | D                                                      | inorganic<br>phosphate<br>deficiency<br>stress response                                                                                                                                                                                                                                                                                                                                                                                                 | within models of plant stress response using <i>Camellia oleifera</i> : ARF20<br>upregulation is a hub molecular marker for inorganic phosphate<br>deficiency stress response [52]                                                                                                                                                                                   | Λ |
| 14 | GH3.9<br>(819387;<br>AT2G47750)                              | tmp_2_19563976_T_G:C              | acatttaaaa      | A<br>C    | cccacatagg                                        | 3.55±0.20<br>4.14±0.30 | ↓ | 3.36  | 10 <sup>-3</sup> | B                                                      | auxin<br>response,<br>seedlings<br>growth, root<br>growth, root<br>length                                                                                                                                                                                                                                                                                                                                                                               | within plant development models using transgenic, additional <i>Arabidopsis</i><br><i>thaliana</i> with reduced GH3.9 expression due to RNA interference: a longer<br>primary root length and increased sensitivity to auxin-mediated inhibition of<br>root growth in seedlings [53]                                                                                 | Λ |
| 15 | IAA5<br>(838128;<br>AT1G15580)                               | ENSVATH04582086:C                 | catgagaaca      | T<br>C    | ataaagtggc                                        | 2.86±0.22<br>4.60±0.30 | ↓ | 9.47  | 10 <sup>-6</sup> | A                                                      | gravitropism,<br>gravitropic<br>response<br>indicator                                                                                                                                                                                                                                                                                                                                                                                                   | within plant gravitropism models using <i>Arabidopsis thaliana</i> : IAA5<br>expression level decreases from root to inflorescence stems as a<br>quantitative gravitropic response indicator [54]                                                                                                                                                                    | Λ |
| 16 | IAA6<br>(841717;<br>AT1G52830)                               | ENSVATH01359837:T                 | gacaacatat      | A<br>T    | aaagcacgag                                        | 2.31±0.14<br>2.61±0.21 | ↓ | 2.48  | 0.05             | D                                                      | adventitious<br>root initiation                                                                                                                                                                                                                                                                                                                                                                                                                         | within plant development models using IAA6 loss-of-function mutant<br><i>Arabidopsis thaliana</i> : IAA6-deficit may be a molecular marker of root under<br>light as an additive controller for initiation of adventitious root [55]                                                                                                                                 | Λ |
| 17 | IAA8<br>(816798;<br>AT2G22670)                               | ENSVATH13333330:G                 | agatctaacta     | C<br>G    | agtactccac                                        | 4.95±0.34<br>5.67±0.38 | ↓ | 2.81  | 10 <sup>-2</sup> | C                                                      | lateral root<br>initiation                                                                                                                                                                                                                                                                                                                                                                                                                              | within plant development models using IAA8 loss-of-function mutant<br><i>Arabidopsis thaliana</i> : significantly more lateral roots [56]                                                                                                                                                                                                                            | Λ |
|    |                                                              | ENSVATH01867835:T                 | cgtcagatct      | A<br>T    | actacagtac                                        | 4.95±0.34<br>4.24±0.31 |   | 3.09  | 10 <sup>-2</sup> | C                                                      | lateral root<br>initiation,                                                                                                                                                                                                                                                                                                                                                                                                                             | within plant development models using transgenic <i>Arabidopsis thaliana</i><br>carrying an additional estrogen-inducible IAA8 gene copy: significantly                                                                                                                                                                                                              | V |
|    |                                                              | ENSVATH05558337:A                 | ccttactttt      | G<br>A    | tagtttatta                                        | 3.36±0.21<br>1.78±0.11 | ↑ | 14.22 | 10 <sup>-6</sup> | A                                                      | gravitropism                                                                                                                                                                                                                                                                                                                                                                                                                                            | fewer lateral roots and abnormal gravitropism [56]                                                                                                                                                                                                                                                                                                                   |   |

Table S1. Cont.

| #  | <i>A. thaliana</i> gene<br>(Entrez ID [37];<br>TAIR ID [38]) | Candidate SNP marker              |                 |           | K <sub>D</sub> , nM, MEAN ± SEM, <i>in silico</i> |                          |   |       |                  | Hand-curated annotation using the PubMed database [39] |                                                                                                                        |                                                                                                                                                                                                                                                                                                                                                           |   |
|----|--------------------------------------------------------------|-----------------------------------|-----------------|-----------|---------------------------------------------------|--------------------------|---|-------|------------------|--------------------------------------------------------|------------------------------------------------------------------------------------------------------------------------|-----------------------------------------------------------------------------------------------------------------------------------------------------------------------------------------------------------------------------------------------------------------------------------------------------------------------------------------------------------|---|
|    |                                                              | TAIR SNP ID [38]: minor<br>allele | 5' flank, 10 bp | WT<br>min | 3 flank, 10 bp                                    | WT<br>min                | Δ | Z     | p                | q                                                      | economically<br>valuable traits                                                                                        | Effect on this trait ("Y": "Λ" as improved; "V" as impaired) within<br>plant breeding models using <i>Arabidopsis thaliana</i> [Ref]                                                                                                                                                                                                                      | Υ |
| 18 | IAA9<br>(836693;<br>AT5G65670)                               | ENSVATH03479832:G                 | ttagtcatta      | A<br>G    | aaacaaaagg                                        | 5.53±0.24<br>6.60±0.32   |   | 5.44  | 10 <sup>-6</sup> | A                                                      | parthenocarpic<br>fruits without<br>fertilization                                                                      | within models of heuristic artificial selection of plants for<br>economically valuable traits using SIIAA9-knockout tomato<br>( <i>Solanum lycopersicum</i> ): developed parthenocarpic fruits without<br>fertilization [57]                                                                                                                              | Λ |
|    |                                                              | ENSVATH03479833:G                 | tagtcattaa      | A<br>G    | aacaaaagga                                        | 5.53±0.24<br>6.60±0.32   | ↓ | 5.47  | 10 <sup>-6</sup> | A                                                      |                                                                                                                        |                                                                                                                                                                                                                                                                                                                                                           |   |
|    |                                                              | ENSVATH12943606:C                 | agtcattaaa      | A<br>C    | acaaaaggat                                        | 5.53±0.24<br>5.67±0.38   |   | 3.09  | 10 <sup>-2</sup> | C                                                      |                                                                                                                        |                                                                                                                                                                                                                                                                                                                                                           |   |
|    |                                                              | ENSVATH03479830:T                 | atagaggtta      | C<br>T    | attagtcatt                                        | 5.53±0.24<br>3.41±0.27   |   | 10.53 | 10 <sup>-6</sup> | A                                                      | auxin response,<br>plant growth,<br>begins to flower                                                                   | within plant growth models using grapevine ( <i>Vitis vinifera</i> L.) treated<br>with exogenous auxin: VvIAA9 overexpression along with increased<br>berry diameter rapidly, whereas <i>Arabidopsis thaliana</i> initially<br>overexpressing AtIAA9 grows quickly and fast begins to flower, but<br>demonstrates hyposensitivity to exogenous auxin [58] | Λ |
|    |                                                              | ENSVATH03479831:G                 | tagaggttac      | A<br>G    | ttagtcatta                                        | 5.53±0.24<br>5.07±0.23   |   | 2.76  | 10 <sup>-2</sup> | C                                                      |                                                                                                                        |                                                                                                                                                                                                                                                                                                                                                           |   |
|    |                                                              | ENSVATH12943604:A                 | ctttttctct      | C<br>A    | tttaccattt                                        | 5.53±0.24<br>4.73±0.30   | ↑ | 4.05  | 10 <sup>-3</sup> | B                                                      |                                                                                                                        |                                                                                                                                                                                                                                                                                                                                                           |   |
|    |                                                              | tmp_5_26253337_C_T:T              | ctctctttac      | C<br>T    | attttaccct                                        | 5.53±0.24<br>4.27±0.25   |   | 7.17  | 10 <sup>-6</sup> | A                                                      |                                                                                                                        |                                                                                                                                                                                                                                                                                                                                                           |   |
|    |                                                              | tmp_5_26253399_A_G:G              | gtcattaaaa      | A<br>G    | caaaaggata                                        | 5.53±0.24<br>5.21±0.22   |   | 1.98  | 0.05             | D                                                      |                                                                                                                        |                                                                                                                                                                                                                                                                                                                                                           |   |
| 19 | IAA10<br>(839290;<br>AT1G04100)                              | tmp_1_1059441_A_G:G               | ataaagttat      | A<br>G    | tagacgaaca                                        | 2.02±0.17<br>2.70±0.19   | ↓ | 5.25  | 10 <sup>-6</sup> | A                                                      | antiviral response                                                                                                     | within models of plant antiviral response using rice ( <i>Oryza sativa</i> L.)<br>infected with rice dwarf virus and, next, treated with exogenous<br>auxin: OsIAA10 downregulated, thereby unleashing antiviral<br>response gene expression [59]                                                                                                         | Λ |
| 20 | IAA11<br>(828982;<br>AT4G28640)                              | ENSVATH12279442:A                 | attattggat      | C<br>A    | aaaaaaatga                                        | 5.73±0.29<br>4.04±0.23   | ↑ | 9.21  | 10 <sup>-6</sup> | A                                                      | sucrose response,<br>indole-3-butyric<br>acid response,<br>stem-base tissues,<br>reactive oxygen<br>species scavenging | within models of plant agricultural treatment response using <i>Carica<br/>papaya</i> plantlets subjected with both sucrose and exogenous indole-3-<br>butyric acid simultaneously: CpIAA11 upregulated in stem-base<br>tissues as an indicator for reactive oxygen species formation or<br>accumulation [60]                                             | Λ |
|    |                                                              | ENSVATH12279443:C                 | aatgataaaa      | T<br>C    | tgggcgagaa                                        | 5.73±0.29<br>5.06±0.28   |   | 3.30  | 10 <sup>-3</sup> | B                                                      |                                                                                                                        |                                                                                                                                                                                                                                                                                                                                                           |   |
| 21 | IAA12<br>(839495;<br>AT1G04550)                              | tmp_1_1240258_T_C:C               | tttgattatg      | T<br>C    | cgaagacaa                                         | 6.85±0.32<br>9.55±0.39   | ↓ | 10.71 | 10 <sup>-6</sup> | A                                                      | photo-oxidative<br>stress response,<br>high light                                                                      | within models of plant light response using <i>Arabidopsis thaliana</i> :<br>suppressed IAA12 may be a molecular marker for plant response to<br>photo-oxidative stress caused by excess high light conditions[61]                                                                                                                                        | Λ |
| 22 | IAA13<br>(817894;<br>AT2G33310)                              | ENSVATH05649388:C                 | cacctaatac      | T<br>C    | ctctctcttt                                        | 10.06±0.50<br>11.13±0.55 |   | 2.90  | 10 <sup>-2</sup> | C                                                      | photo-oxidative<br>stress response,<br>high light<br>condition                                                         | within models of plant light response using <i>Arabidopsis thaliana</i> :<br>suppressed IAA13 may be a molecular marker for plant response to<br>photo-oxidative stress caused by excess high light conditions[61]                                                                                                                                        | Λ |
|    |                                                              | ENSVATH05649389:G                 | ctccaccacc      | T<br>G    | aatcctctct                                        | 10.06±0.50<br>12.78±0.39 | ↓ | 8.18  | 10 <sup>-6</sup> | A                                                      |                                                                                                                        |                                                                                                                                                                                                                                                                                                                                                           |   |
|    |                                                              | tmp_2_14116146_T_A:T              | ttaataataa      | A<br>T    | attaggaat                                         | 3.27±0.15<br>3.58±0.22   |   | 2.42  | 0.05             | D                                                      |                                                                                                                        |                                                                                                                                                                                                                                                                                                                                                           |   |
|    |                                                              | tmp_2_14115982_G_A:T              | tttcagattt      | C<br>T    | aagaaaccct                                        | 10.06±0.50<br>7.74±0.35  | ↑ | 7.79  | 10 <sup>-6</sup> | A                                                      | sulphur starvation<br>response, cysteine<br>excess, dwarf plant                                                        | within models of plant sulphur starvation response using<br><i>Arabidopsis thaliana</i> : IAA13 upregulation along with an increase in<br>cysteine level by 3.5 and the appearance of dwarf plants [62]                                                                                                                                                   | Λ |

Table S1. Cont.

| #  | <i>A. thaliana</i> gene<br>(Entrez ID [37];<br>TAIR ID [38]) | Candidate SNP marker              |                 | K <sub>D</sub> , nM, MEAN ± SEM, <i>in silico</i> |                |                        |   |      |                  | Hand-curated annotation using the PubMed database [39] |                                                                                                       |                                                                                                                                                                                                                                                                                                                                                                                            | Y |
|----|--------------------------------------------------------------|-----------------------------------|-----------------|---------------------------------------------------|----------------|------------------------|---|------|------------------|--------------------------------------------------------|-------------------------------------------------------------------------------------------------------|--------------------------------------------------------------------------------------------------------------------------------------------------------------------------------------------------------------------------------------------------------------------------------------------------------------------------------------------------------------------------------------------|---|
|    |                                                              | TAIR SNP ID [38]: minor<br>allele | 5' flank, 10 bp | WT<br>min                                         | 3 flank, 10 bp | WT<br>min              | Δ | Z    | p                | q                                                      | economically<br>valuable traits                                                                       | Effect on this trait ("Y": "N" as improved; "V" as impaired) within<br>plant breeding models using <i>Arabidopsis thaliana</i> [Ref]                                                                                                                                                                                                                                                       |   |
| 23 | IAA18<br>(841623;<br>AT1G51950)                              | tmp_1_19305020_T_A:A              | aaatatgttt      | T<br>A                                            | aaataaaaag     | 3.20±0.19<br>3.63±0.20 | ↓ | 3.09 | 10 <sup>-2</sup> | C                                                      | host-plant response<br>to viral infection                                                             | within models of host-plant response to viral infection using <i>Arabidopsis thaliana</i> (ecotype Shahdara) infected with <i>Tobacco mosaic virus</i> : IAA18 downregulation is a molecular marker for plant response to <i>Tobacco mosaic virus</i> infection [63]                                                                                                                       | Y |
| 24 | IAA19<br>(820793;<br>AT3G15540)                              | ENSVATH10697478:A                 | gaccaacgaa      | G<br>A                                            | caacatataa     | 5.00±0.26<br>3.68±0.18 | ↑ | 8.54 | 10 <sup>-6</sup> | A                                                      | plant growth, root<br>elongation, floral<br>transition                                                | within plant growth models using transgenic <i>Arabidopsis thaliana</i> plants overexpressing <i>VvIAA19</i> taken from grapevine ( <i>Vitis vinifera</i> L.): faster growth, accelerated both root elongation and floral transition without any detectable harm [64]                                                                                                                      | Λ |
| 25 | IAA29<br>(829361;<br>AT4G32280)                              | ENSVATH02950386:T                 | acatatatat      | G<br>T                                            | tatatattttg    | 1.55±0.09<br>1.71±0.11 | ↓ | 2.25 | 0.05             | D                                                      | plant response to<br>water-deficit stress                                                             | within models of plant response to water-deficit stress using peanut subjected with water deficit stress: IAA29 downregulation may be a molecular marker for plant response to water-deficit stress [65]                                                                                                                                                                                   | Λ |
| 26 | IAA30<br>(825383;<br>AT3G62100)                              | ENSVATH12879768:G                 | tccattctct      | A<br>G                                            | tatataatac     | 1.39±0.13<br>1.62±0.12 | ↓ | 2.57 | 0.05             | D                                                      | plant apomixis                                                                                        | according to the identification of this gene for the first time in <i>Paspalum notatum</i> via searching for homology to the rice ( <i>Oryza sativa</i> L.) gene <i>OsIAA30</i> through the <i>Paspalum notatum</i> transcriptome: <i>PnIAA30</i> downregulated in reproductive tissues of apomictic <i>Paspalum notatum</i> , namely: in apomictic spikelets compared to sexual ones [66] | V |
|    |                                                              | ENSVATH06359108:T                 | acatctttaa      | C<br>T                                            | aacactgtct     | 4.82±0.19<br>4.05±0.17 | ↑ | 6.08 | 10 <sup>-6</sup> | A                                                      | plant growth,<br>primary root                                                                         | within plant growth models using <i>Arabidopsis thaliana</i> mutant overexpressing <i>IAA30</i> : dwarfed growth with stunted primary root growth because of disturbed root apical meristem activity and seed germination repressed as a response to high salt stress [67]                                                                                                                 | Λ |
|    |                                                              | ENSVATH06359109:T                 | ttaattaaaa      | A<br>T                                            | aaaaacatat     | 4.82±0.19<br>4.23±0.18 |   |      |                  |                                                        | growth, root apical<br>meristem, plant<br>response to high<br>salt stress                             |                                                                                                                                                                                                                                                                                                                                                                                            |   |
| 27 | IAA34<br>(838070;<br>AT1G15050)                              | ENSVATH11247661:C                 | agctgcttga      | T<br>C                                            | ataaatcaac     | 2.58±0.17<br>3.45±0.27 | ↓ | 5.67 | 10 <sup>-6</sup> | A                                                      | apical-hook defect,<br>seedling<br>development start                                                  | within plant growth models using double <i>IAA32-IAA34</i> knockout <i>Arabidopsis thaliana</i> mutant in comparison with both wild-typed and single either <i>IAA32</i> or <i>IAA34</i> knockouts: an apical-hook maintenance defects during seedling development starts [68]                                                                                                             | V |
|    |                                                              | tmp_1_5183068_T_A:T               | gcttgatata      | A<br>T                                            | atcaacatca     | 2.58±0.17<br>1.78±0.18 | ↑ | 6.11 | 10 <sup>-6</sup> | A                                                      | cell growth, apical-<br>hook formation,<br>seedling<br>development start                              | within plant growth models using transgenic <i>Arabidopsis thaliana</i> carrying <i>IAA34</i> -promoter-driven β-glucuronidase reporter-gene construct: <i>IAA34</i> upregulation is a molecular marker for reduced cell growth and apical hook formation during seedling development starts [68]                                                                                          | Λ |
| 28 | SAUR23<br>(831310;<br>AT5G18060)                             | ENSVATH03072882:A                 | ctcatttcat      | G<br>A                                            | attaggcttt     | 4.61±0.27<br>4.20±0.28 | ↑ | 2.15 | 0.05             | D                                                      | palisade and<br>spongy tissue<br>misbalance, leaves<br>rolling, plant<br>growth, plant<br>development | within plant leaves development models using birch ( <i>Betula pendula</i> ) mutants: BpSAUR23 upregulation along with palisade and spongy tissue misbalance leading leaves rolling as defects in plant growth and development [69]                                                                                                                                                        | V |

Table S1. Cont.

| #  | <i>A. thaliana</i> gene<br>(Entrez ID [37];<br>TAIR ID [38]) | Candidate SNP marker              |                 |           |                | K <sub>D</sub> , nM, MEAN ± SEM, <i>in silico</i> |         |                  |   |   | Hand-curated annotation using the PubMed database [39]                                      |                                                                                                                                                                                                                                                                                                      |   |
|----|--------------------------------------------------------------|-----------------------------------|-----------------|-----------|----------------|---------------------------------------------------|---------|------------------|---|---|---------------------------------------------------------------------------------------------|------------------------------------------------------------------------------------------------------------------------------------------------------------------------------------------------------------------------------------------------------------------------------------------------------|---|
|    |                                                              | TAIR SNP ID [38]: minor<br>allele | 5' flank, 10 bp | WT<br>min | 3 flank, 10 bp | WT<br>min                                         | Δ       | Z                | p | Q | economically<br>valuable traits                                                             | Effect on this trait ("Y": "N" as improved; "V" as impaired) within<br>plant breeding models using <i>Arabidopsis thaliana</i> [Ref]                                                                                                                                                                 | Y |
| 29 | SAUR24<br>(28721172;<br>AT5G18080)                           | tmp_5_5983636_A_T:T               | ctgttttagt      | A<br>T    | tgtccaacgc     | 3.39±0.23<br>6.99±0.36                            | ↓ 17.13 | 10 <sup>-6</sup> | A |   | hypocotyl length,<br>leaf size, plant<br>growth, plant<br>development                       | within plant leaves development models using <i>Arabidopsis thaliana</i> (ecotype Columbia) treated with exogenous artificial microRNA targeted to SAUR19-24: SAUR24 downregulation along with decrease in the hypocotyl length and leaf size as defects in plant growth and development [70]        | V |
| 30 | SAUR26<br>(8211111;<br>AT3G03850)                            | ENSVATH02109247:A                 | cacactttta      | G<br>A    | acaccattgt     | 5.20±0.29<br>3.63±0.19                            | ↑ 9.35  | 10 <sup>-6</sup> | A |   | thermo-<br>responsiveness                                                                   | within plant thermo-responsiveness models using SAUR26-knockin <i>Arabidopsis thaliana</i> (ecotype Columbia): SAUR26-overexpression along with enhanced thermo-responsiveness [71]                                                                                                                  | Λ |
| 31 | SAUR27<br>(821121;<br>AT3G03840)                             | tmp_3_981048_A_T:T                | tattgtatta      | A<br>T    | tattttcctg     | 3.00±0.13<br>3.37±0.17                            | ↓ 3.44  | 10 <sup>-3</sup> | B |   | thermo-<br>responsiveness                                                                   | within models of plant adaptation to the environment using polymorphic variants of <i>Arabidopsis thaliana</i> (ecotype Columbia) that differ from each other in thermos-responsiveness: plants with higher thermos-responsiveness often have higher expression of SAUR27 and <i>vice versa</i> [71] | V |
|    |                                                              | ENSVATH07951739:G                 | tgtattaata      | T<br>G    | tttcctgatt     | 3.00±0.13<br>2.75±0.12                            | 2.74    | 10 <sup>-2</sup> | C |   |                                                                                             |                                                                                                                                                                                                                                                                                                      | - |
|    |                                                              | tmp_3_981039_A_C:C                | tatttctttt      | A<br>C    | ttgtattaat     | 3.00±0.13<br>2.63±0.14                            | ↑ 3.88  | 10 <sup>-3</sup> | B |   |                                                                                             |                                                                                                                                                                                                                                                                                                      | Λ |
| 32 | SAUR68<br>(839828;<br>AT1G29510)                             | ENSVATH04665559:T                 | ctcttgatcat     | A<br>T    | taaacgtccg     | 2.83±0.18<br>3.72±0.20                            | ↓ 6.50  | 10 <sup>-6</sup> | A |   | heterosis, auxin-<br>induced plant<br>growth                                                | within plant heterosis models using hybrids of Easter lily ( <i>Lilium longiflorum</i> ): LISAUR68 down-regulation along with enhanced auxin-induced growth in hypocotyls, inflorescence, stems, petals and stamen filaments [72]                                                                    | Λ |
|    |                                                              | ENSVATH01123843:T                 | gtcatataaa      | C<br>T    | gtccgtatag     | 2.83±0.18<br>2.24±0.15                            | ↑ 5.11  | 10 <sup>-6</sup> | A |   | plant growth,<br>hypocotyls<br>growth, petals<br>growth, stamen<br>filaments growth         | within plant growth models using transgenic <i>Arabidopsis thaliana</i> carrying SAUR68/β-glucuronidase fused reporter-gene construct: SAUR68 gain-of-function along with more longer hypocotyls, petals and stamen filaments [73]                                                                   | Λ |
| 33 | SAUR75<br>(832840;<br>AT5G27780)                             | ENSVATH03147590:T                 | atatgttggt      | G<br>T    | aaacatatgt     | 3.57±0.27<br>4.19±0.25                            | ↓ 3.33  | 10 <sup>-3</sup> | B |   | fertilization<br>defects, seed<br>abortion, shorter<br>siliques, fewer<br>seeds per silique | within plant fertilization models using homozygous SAUR75-knockout <i>Arabidopsis thaliana</i> : SAUR75 deficiency along with to fertilization defects such as seed abortion, shorter siliques, and fewer seeds per silique [74]                                                                     | V |
|    |                                                              | tmp_5_9839519_T_G:C               | actaaacaaa      | A<br>C    | tatatgttgt     | 3.57±0.27<br>3.06±0.21                            | ↑ 3.04  | 10 <sup>-2</sup> | V |   | circadian rhythm                                                                            | within plant circadian rhythm models using <i>Arabidopsis thaliana</i> : SAUR75 expression exhibits a circadian rhythm with highest levels of expression in the morning [73]                                                                                                                         | Λ |
| 34 | PIN1<br>(843693;<br>AT1G73590)                               | ENSVATH05139219:T                 | aaaaaaataa      | A<br>T    | ataaaaagaa     | 2.25±0.15<br>2.06±0.13                            | ↑ 2.00  | 0.05             | D |   | plant<br>development, root<br>architecture, lateral<br>root primordia,                      | within plant developmental models using <i>Arabidopsis thaliana</i> : in roots, PIN1 excess can lead excessive auxin accumulation in the endodermal, cortical, and epidermal cells surrounding lateral root primordia that can reduced lateral root density [75]                                     | V |



## lateral root density

Table S1. Cont.

| #  | <i>A. thaliana</i> gene<br>(Entrez ID [37];<br>TAIR ID [38]) | Candidate SNP marker              |                 |           |                | K <sub>D</sub> , nM, MEAN ± SEM, <i>in silico</i> |   |       |                  | Hand-curated annotation using the PubMed database [39] |                                                                          |                                                                                                                                                                                                                                                                                                       |   | Υ |
|----|--------------------------------------------------------------|-----------------------------------|-----------------|-----------|----------------|---------------------------------------------------|---|-------|------------------|--------------------------------------------------------|--------------------------------------------------------------------------|-------------------------------------------------------------------------------------------------------------------------------------------------------------------------------------------------------------------------------------------------------------------------------------------------------|---|---|
|    |                                                              | TAIR SNP ID [38]: minor<br>allele | 5' flank, 10 bp | WT<br>min | 3 flank, 10 bp | WT<br>min                                         | Δ | Z     | p                | Q                                                      | economically<br>valuable traits                                          | Effect on this trait (Υ: “Λ” as improved; “V” as impaired) within<br>plant breeding models using <i>Arabidopsis thaliana</i> [Ref]                                                                                                                                                                    |   |   |
| 35 | PIN3<br>(843432,<br>AT1G70940)                               | ENSVATH01518899:T                 | ttatttttttt     | G<br>T    | ataagatcga     | 3.68±0.24<br>2.76±0.18                            |   | 6.29  | 10 <sup>-6</sup> | A                                                      | plant<br>development, late<br>ovule initiation,<br>pistil size           | within plant ovule initiation models using <i>Arabidopsis thaliana</i><br>mutants: brassinosteroids upregulate <i>PIN3</i> that contribute to both<br>late ovule initiation and increased pistil size [76]                                                                                            | Λ |   |
|    |                                                              | ENSVATH13788778:T                 | ttattttaata     | A<br>T    | ttaaacaaaa     | 3.68±0.24<br>2.96±0.20                            | ↑ | 4.70  | 10 <sup>-3</sup> | B                                                      |                                                                          |                                                                                                                                                                                                                                                                                                       |   |   |
|    |                                                              | tmp_1_26742916_T_A:A              | agaactatat      | T<br>A    | gttattttttt    | 3.68±0.24<br>2.14±0.20                            |   | 9.60  | 10 <sup>-6</sup> | A                                                      |                                                                          |                                                                                                                                                                                                                                                                                                       |   |   |
| 36 | PIN4<br>(814670;<br>AT2G01420)                               | ENSVATH05203899:A                 | tttgaaaagg      | G<br>A    | aataaatgtg     | 4.66±0.25<br>5.04±0.27                            | ↓ | 2.06  | 0.05             | D                                                      | plant response to<br>water-deficit stress                                | within models of plant response to water-deficit stress using<br><i>Arabidopsis thaliana</i> subjected with polyethyleneglycol exposure: <i>PIN4</i><br>downregulation is a molecular marker for plant response to water-<br>deficit stress [77]                                                      | Λ |   |
|    |                                                              | ENSVATH10501410:A                 | agtacgtaga      | C<br>A    | aatagtttga     | 4.71±0.30<br>3.53±0.21                            |   | 6.62  | 10 <sup>-6</sup> | A                                                      | plant<br>development,<br>high-nitrate<br>conditions, shoot-<br>branching | within models of plant response to high-nitrate conditions using<br><i>Arabidopsis thaliana</i> : PIN4 overaccumulation along with increased<br>shoot-branching [78]                                                                                                                                  |   |   |
|    |                                                              | ENSVATH10501411:A                 | gtggctgtct      | T<br>A    | cttgtaccaa     | 4.71±0.30<br>3.66±0.23                            | ↑ | 5.62  | 10 <sup>-6</sup> | A                                                      |                                                                          |                                                                                                                                                                                                                                                                                                       |   |   |
|    |                                                              | tmp_2_183708_G_A:T                | cttcttgtag      | C<br>T    | aagtacgtag     | 4.71±0.30<br>2.93±0.18                            |   | 10.74 | 10 <sup>-6</sup> | A                                                      |                                                                          |                                                                                                                                                                                                                                                                                                       |   |   |
| 37 | PIN5<br>(831515;<br>AT5G16530)                               | ENSVATH10785668:C                 | tgtttaattt      | A<br>C    | tatctaaac      | 3.77±0.19<br>4.32±0.22                            |   | 3.79  | 10 <sup>-3</sup> | B                                                      | root meristem size,<br>root growth                                       | within plant developmental models using PIN5-deficient <i>Arabidopsis</i><br><i>thaliana</i> : enlarged root meristem size and enhanced root growth [79]                                                                                                                                              | Λ |   |
|    |                                                              | tmp_5_5400527_C_T:T               | tatatctaaa      | G<br>T    | tttacttttg     | 3.77±0.19<br>4.35±0.25                            | ↓ | 3.69  | 10 <sup>-6</sup> | A                                                      |                                                                          |                                                                                                                                                                                                                                                                                                       |   |   |
| 38 | PIN7<br>(838916;<br>AT1G23080)                               | ENSVATH01091865:G                 | ctaagatata      | T<br>G    | atagtattaa     | 1.36±0.08<br>2.06±0.14                            | ↓ | 9.37  | 10 <sup>-6</sup> | A                                                      | gravitropism,<br>lateral root<br>bending                                 | within plant gravitropism models using PIN7-deficient <i>Arabidopsis</i><br><i>thaliana</i> : lateral roots display upward bending instead of downward<br>bending as impaired gravitropism [80]                                                                                                       | V |   |
|    |                                                              | ENSVATH01091864:G                 | atatatagta      | T<br>G    | taaaaagtac     | 1.45±0.10<br>1.27±0.07                            |   | 3.07  | 10 <sup>-2</sup> | C                                                      | rhizobacteria<br>beneficial effect,<br>plant                             | within models of the beneficial effect of rhizobacteria on plant<br>development using <i>Arabidopsis thaliana</i> subjected with roots<br>inoculation by <i>Bradyrhizobium japonicum</i> : host plant transcriptional<br>reprogramming to overexpress PIN7 resulting in improved<br>gravitropism [81] |   |   |
|    |                                                              | ENSVATH01091866:C                 | ggggaaagct      | A<br>C    | agatatatat     | 1.36±0.08<br>1.18±0.09                            | ↑ | 3.07  | 10 <sup>-2</sup> | C                                                      | development,<br>gravitropism                                             |                                                                                                                                                                                                                                                                                                       |   |   |
| 39 | PIN8<br>(831362;<br>AT5G15100)                               | tmp_5_4894180_G_T:A               | ataaattaaa      | C<br>A    | ccagtgtttt     | 5.61±0.21<br>5.23±0.24                            | ↑ | 2.37  | 0.05             | D                                                      | plant<br>development,<br>plant growth,<br>epinastic leaves               | within plant development models using transgenic <i>Arabidopsis</i><br><i>thaliana</i> overexpressing <i>PIN8</i> : reduced plant growth along with<br>epinastic leaves as developmental defects, the severity of which<br>increases with increasing PIN8 protein content [82]                        | V |   |
| 40 | BAM1<br>(821975;<br>AT3G23920)                               | tmp_3_8641143_G_T:T               | atagacgaac      | G<br>T    | tattagagac     | 3.67±0.24<br>4.62±0.28                            |   | 5.14  | 10 <sup>-6</sup> | A                                                      | food allergenicity                                                       | according to an experimental searching for food allergens from<br>Chinese cultivars of the common wheat <i>Triticum aestivum</i> L. (1753)<br>by means of the human immunoglobulin E binding capacity using<br>enzyme-linked immunosorbent assay: beta-amylases turned out to                         | Λ |   |
|    |                                                              | tmp_3_8641145_A_T:T               | agacgaacgt      | A<br>T    | ttagagactc     | 3.67±0.24<br>4.96±0.26                            | ↓ | 7.21  | 10 <sup>-6</sup> | A                                                      |                                                                          |                                                                                                                                                                                                                                                                                                       |   |   |

ENSVATH00344250:T      ataatagacg    A<sub>T</sub>    acgtattaga      3.67±0.24  
2.73±0.16      ↑ 6.79 10<sup>-6</sup> A

be among the most powerful food allergens, whose allergenicity for humans increases with the level of expression and *vice versa* [83]

Table S1. Cont.

| #  | <i>A. thaliana</i> gene<br>(Entrez ID [37];<br>TAIR ID [38]) | Candidate SNP marker           |                 |                |                | K <sub>D</sub> , nM, MEAN ± SEM, <i>in silico</i> |   |       |                  | Hand-curated annotation using the PubMed database [39] |                              |                                                                                                                                   |
|----|--------------------------------------------------------------|--------------------------------|-----------------|----------------|----------------|---------------------------------------------------|---|-------|------------------|--------------------------------------------------------|------------------------------|-----------------------------------------------------------------------------------------------------------------------------------|
|    |                                                              | TAIR SNP ID [38]: minor allele | 5' flank, 10 bp | WT min         | 3 flank, 10 bp | WT min                                            | Δ | Z     | p                | Q                                                      | economically valuable traits | Effect on this trait ('Y': "Λ" as improved; "V" as impaired) within plant breeding models using <i>Arabidopsis thaliana</i> [Ref] |
| 41 | BAM2<br>(827959;<br>AT4G00490)                               | tmp_4_222257_A_C:C             | acccttttgt      | A <sub>C</sub> | ctcaacggat     | 4.09±0.26<br>6.44±0.34                            | ↓ | 10.82 | 10 <sup>-6</sup> | A                                                      |                              | Λ                                                                                                                                 |
| 42 | BAM5<br>(827185;<br>AT4G15210)                               | ENSVATH06672707:C              | ttctatataa      | A <sub>C</sub> | gagctcgtga     | 1.34±0.10<br>1.50±0.11                            |   | 2.18  | 0.05             | D                                                      |                              |                                                                                                                                   |
|    |                                                              | ENSVATH06672712:T              | aagtcattat      | A <sub>T</sub> | caatcctcaa     | 4.11±0.45<br>5.38±0.29                            | ↓ | 4.47  | 10 <sup>-3</sup> | B                                                      |                              | Λ                                                                                                                                 |
|    |                                                              | ENSVATH11769885:A              | aaagtcatta      | T <sub>A</sub> | acaatcctca     | 4.11±0.45<br>5.38±0.29                            |   | 4.47  | 10 <sup>-3</sup> | B                                                      |                              |                                                                                                                                   |
|    |                                                              | ENSVATH06672714:C              | agggcaataa      | A <sub>C</sub> | gtcattatac     | 4.11±0.45<br>3.61±0.24                            | ↑ | 2.03  | 0.05             | D                                                      |                              | V                                                                                                                                 |
|    |                                                              | ENSVATH11769886:T              | caataaagtc      | A <sub>T</sub> | ttataacaatc    | 4.11±0.45<br>3.10±0.21                            |   | 4.38  | 10 <sup>-6</sup> | A                                                      |                              |                                                                                                                                   |
| 43 | BAM6<br>(817789;<br>AT2G32290)                               | ENSVATH00256756:A              | tgatagcata      | C <sub>A</sub> | gaacgcgccca    | 6.85±0.41<br>4.50±0.26                            |   | 10.15 | 10 <sup>-6</sup> | A                                                      |                              |                                                                                                                                   |
|    |                                                              | ENSVATH00256756:T              | tgatagcata      | C <sub>T</sub> | gaacgcgccca    | 6.85±0.41<br>4.28±0.26                            |   | 11.13 | 10 <sup>-6</sup> | A                                                      |                              |                                                                                                                                   |
|    |                                                              | ENSVATH07907378:T              | aacaaaaata      | C <sub>T</sub> | aaaaaaaaaaa    | 6.85±0.41<br>6.09±0.31                            | ↑ | 3.01  | 10 <sup>-2</sup> | C                                                      | food allergenicity           | V                                                                                                                                 |
|    |                                                              | tmp_2_13717083_T_A:T           | caaaaataca      | A <sub>T</sub> | aaaaaaaaaaa    | 6.85±0.41<br>3.70±0.21                            |   | 14.89 | 10 <sup>-6</sup> | A                                                      |                              |                                                                                                                                   |
| 44 | BAM7<br>(819196;<br>AT2G45880)                               | ENSVATH13650292:C              | cattttaata      | A <sub>C</sub> | taataatctc     | 2.64±0.17<br>1.98±0.13                            | ↑ | 6.36  | 10 <sup>-6</sup> | A                                                      |                              | V                                                                                                                                 |
| 45 | BMY2<br>(834566;<br>AT5G45300)                               | ENSVATH03360456:G              | aacgtaattt      | A <sub>G</sub> | taataattac     | 2.39±0.14<br>4.05±0.25                            | ↓ | 12.18 | 10 <sup>-6</sup> | A                                                      |                              | Λ                                                                                                                                 |
|    |                                                              | ENSVATH03360457:G              | cgtaatttat      | A <sub>G</sub> | ataattaccg     | 2.39±0.14<br>3.80±0.20                            |   | 11.65 | 10 <sup>-6</sup> | A                                                      |                              |                                                                                                                                   |
|    |                                                              | tmp_5_18353506_C_T:T           | ttaatattga      | C <sub>T</sub> | gattttgata     | 4.65±0.30<br>4.21±0.26                            | ↑ | 2.27  | 0.05             | D                                                      |                              | V                                                                                                                                 |
| 46 | BMY3<br>(831985;<br>AT5G18670)                               | ENSVATH06989997:C              | tttcatctta      | T <sub>C</sub> | ataaacaga      | 1.70±0.14<br>3.28±0.22                            | ↓ | 12.15 | 10 <sup>-6</sup> | A                                                      |                              | Λ                                                                                                                                 |
| 47 | CT-BMY                                                       | ENSVATH14232542:A              | tgaggtgtaa      | G              | aaccgtgtga     | 5.58±0.22                                         | ↑ | 10.20 | 10 <sup>-6</sup> | A                                                      |                              | V                                                                                                                                 |

|                        |   |           |
|------------------------|---|-----------|
| (827419;<br>AT4G17090) | A | 3.85±0.24 |
|------------------------|---|-----------|

Table S1. Cont.

| #  | <i>A. thaliana</i> gene<br>(Entrez ID [37];<br>TAIR ID [38]) | Candidate SNP marker              |                 |           | K <sub>D</sub> , nM, MEAN ± SEM, <i>in silico</i> |                        |   |       |                  | Hand-curated annotation using the PubMed database [39] |                                 |                                                                                                                                                                                                                                                                                                                                                                                                             | Y |
|----|--------------------------------------------------------------|-----------------------------------|-----------------|-----------|---------------------------------------------------|------------------------|---|-------|------------------|--------------------------------------------------------|---------------------------------|-------------------------------------------------------------------------------------------------------------------------------------------------------------------------------------------------------------------------------------------------------------------------------------------------------------------------------------------------------------------------------------------------------------|---|
|    |                                                              | TAIR SNP ID [38]: minor<br>allele | 5' flank, 10 bp | WT<br>min | 3 flank, 10 bp                                    | WT<br>min              | Δ | Z     | p                | Q                                                      | economically<br>valuable traits | Effect on this trait ("Y: "N" as improved; "V" as impaired) within plant<br>breeding models using <i>Arabidopsis thaliana</i> [Ref]                                                                                                                                                                                                                                                                         |   |
| 48 | A7<br>(828956;<br>AT4G28395)                                 | ENSVATH14305782:G                 | aataaccta       | A<br>G    | tatgtgtagg                                        | 3.77±0.23<br>2.88±0.21 | ↑ | 5.70  | 10 <sup>-6</sup> | A                                                      | food<br>allergenicity           | according to an experimental searching for food allergens from Chinese cultivars of the common wheat <i>Triticum aestivum</i> L. (1753) by means of the human immunoglobulin E binding capacity using enzyme-linked immunosorbent assay: albumins turned out to be among the most powerful food allergens, whose allergenicity for humans increases with the level of expression and <i>vice versa</i> [83] | V |
| 49 | AT1G05450<br>(838763)                                        | ENSVATH04524326:G                 | ttagatatct      | A<br>G    | tatatcgaca                                        | 1.96±0.16<br>3.65±0.24 | ↓ | 12.01 | 10 <sup>-6</sup> | A                                                      |                                 |                                                                                                                                                                                                                                                                                                                                                                                                             | Λ |
|    |                                                              | ENSVATH07504033:T                 | tgttttttaa      | A<br>T    | atataatttg                                        | 1.96±0.16<br>1.69±0.13 | ↑ | 2.63  | 10 <sup>-2</sup> | C                                                      |                                 |                                                                                                                                                                                                                                                                                                                                                                                                             | V |
| 50 | AT1G07747<br>(5007672)                                       | ENSVATH01022636:T                 | atcttctaag      | C<br>T    | aagactagaa                                        | 5.67±0.34<br>4.28±0.27 |   | 6.39  | 10 <sup>-6</sup> | A                                                      |                                 |                                                                                                                                                                                                                                                                                                                                                                                                             | V |
|    |                                                              | ENSVATH04536165:C                 | agcaagacta      | G<br>C    | aaattagata                                        | 5.67±0.34<br>4.81±0.30 |   | 3.81  | 10 <sup>-3</sup> | B                                                      |                                 |                                                                                                                                                                                                                                                                                                                                                                                                             |   |
|    |                                                              | tmp_1_2403515_A_T:T               | gcaagactag      | A<br>T    | aattagatag                                        | 5.67±0.34<br>3.91±0.24 | ↑ | 8.68  | 10 <sup>-6</sup> | A                                                      |                                 |                                                                                                                                                                                                                                                                                                                                                                                                             |   |
|    |                                                              | tmp_1_2403545_C_T:T               | cttaagggtta     | C<br>T    | aacttacaag                                        | 5.67±0.34<br>5.06±0.26 |   | 2.90  | 10 <sup>-2</sup> | C                                                      |                                 |                                                                                                                                                                                                                                                                                                                                                                                                             |   |
| 51 | AT1G18280<br>(838408)                                        | tmp_1_6294116_T_C:C               | acactttcta      | T<br>C    | atgaacaaac                                        | 2.84±0.19<br>4.13±0.30 | ↓ | 7.75  | 10 <sup>-6</sup> | A                                                      |                                 |                                                                                                                                                                                                                                                                                                                                                                                                             | Λ |
| 52 | AT1G32280<br>(840120)                                        | tmp_1_11646138_A_G:G              | attactatat      | A<br>G    | taagatatct                                        | 1.18±0.08<br>1.75±0.13 | ↓ | 7.71  | 10 <sup>-6</sup> | A                                                      |                                 |                                                                                                                                                                                                                                                                                                                                                                                                             | Λ |
| 53 | AT1G36150<br>(840520)                                        | ENSVATH01212636:T                 | aaaacctaata     | A<br>T    | gaaaaacaag                                        | 4.45±0.27<br>5.91±0.33 | ↓ | 6.77  | 10 <sup>-6</sup> | A                                                      |                                 |                                                                                                                                                                                                                                                                                                                                                                                                             | Λ |
| 54 | AT1G43665<br>(840951)                                        | ENSVATH04847100:A                 | cgaagaacta      | G<br>A    | agtttgattg                                        | 7.91±0.36<br>7.04±0.49 |   | 2.82  | 10 <sup>-2</sup> | C                                                      |                                 |                                                                                                                                                                                                                                                                                                                                                                                                             | V |
|    |                                                              | tmp_1_16453819_G_A:T              | gtggcagctg      | C<br>T    | taaagttata                                        | 7.91±0.36<br>4.57±0.26 | ↑ | 20.59 | 10 <sup>-6</sup> | A                                                      |                                 |                                                                                                                                                                                                                                                                                                                                                                                                             |   |
| 55 | AT1G43667<br>(840952)                                        | tmp_1_16465581_G_A:T              | aacattactc      | C<br>T    | atctatatac                                        | 3.52±0.24<br>3.11±0.22 |   | 2.54  | 0.05             | D                                                      |                                 |                                                                                                                                                                                                                                                                                                                                                                                                             | V |
|    |                                                              | tmp_1_16465604_A_T:A              | tacctatatt      | T<br>A    | ggcttattgc                                        | 3.52±0.24<br>2.96±0.22 | ↑ | 3.40  | 10 <sup>-3</sup> | B                                                      |                                 |                                                                                                                                                                                                                                                                                                                                                                                                             |   |
| 56 | AT1G62510<br>(842548)                                        | ENSVATH01439009:T                 | aggacattca      | A<br>T    | tatcaaataa                                        | 3.05±0.20<br>3.52±0.20 |   | 3.31  | 10 <sup>-3</sup> | B                                                      |                                 |                                                                                                                                                                                                                                                                                                                                                                                                             | Λ |
|    |                                                              | ENSVATH01439010:C                 | caggacattc      | A<br>C    | tatatcaaata                                       | 3.05±0.20<br>3.52±0.20 | ↓ | 3.31  | 10 <sup>-3</sup> | B                                                      |                                 |                                                                                                                                                                                                                                                                                                                                                                                                             |   |
|    |                                                              | tmp_1_23137327_T_G:C              | acattcatat      | A<br>C    | tcaaataacc                                        | 3.05±0.20<br>3.52±0.20 |   | 3.31  | 10 <sup>-3</sup> | B                                                      |                                 |                                                                                                                                                                                                                                                                                                                                                                                                             |   |

tmp\_1\_23137326\_A\_G:C    cattcatata    T  
C    caaataacct    3.05±0.20    ↑ 2.30 0.05 D

V

Table S1. Cont.

| #  | <i>A. thaliana</i> gene<br>(Entrez ID [37];<br>TAIR ID [38]) | Candidate SNP marker               |                 |           | K <sub>D</sub> , nM, MEAN ± SEM, <i>in silico</i> |                        |   |       |                  |   | Hand-curated annotation using the PubMed database [39] |                                                                                                                                                                                                                                                                                                                                                                                                                            |      | γ                |      |                  |   |
|----|--------------------------------------------------------------|------------------------------------|-----------------|-----------|---------------------------------------------------|------------------------|---|-------|------------------|---|--------------------------------------------------------|----------------------------------------------------------------------------------------------------------------------------------------------------------------------------------------------------------------------------------------------------------------------------------------------------------------------------------------------------------------------------------------------------------------------------|------|------------------|------|------------------|---|
|    |                                                              | TAIR SNP ID [38]): minor<br>allele | 5' flank, 10 bp | WT<br>min | 3 flank, 10 bp                                    | WT<br>min              | Δ | Z     | p                | Q | economically<br>valuable traits                        | Effect on this trait ("Y": "Λ" as improved; "V" as impaired) within plant<br>breeding models using <i>Arabidopsis thaliana</i> [Ref]                                                                                                                                                                                                                                                                                       |      |                  |      |                  |   |
| 57 | AT1G48750<br>(841297)                                        | ENSVATH04908482:C                  | atcccctata      | A<br>C    | atagaaggga                                        | 1.85±0.13<br>2.46±0.21 | ↓ | 5.22  | 10 <sup>-6</sup> | A | food<br>allergenicity                                  | according to an experimental searching for food allergens from Chinese<br>cultivars of the common wheat <i>Triticum aestivum</i> L. (1753) by means of<br>the human immunoglobulin E binding capacity using enzyme-linked<br>immunosorbent assay: albumins turned out to be among the most<br>powerful food allergens, whose allergenicity for humans increases with<br>the level of expression and <i>vice versa</i> [83] | Λ    |                  |      |                  |   |
| 58 | AT4G08670<br>(826433)                                        | ENSVATH14092599:A                  | caattcttat      | C<br>A    | ttttcttttt                                        | 4.55±0.25<br>3.53±0.22 | ↑ | 6.24  | 10 <sup>-6</sup> | A |                                                        |                                                                                                                                                                                                                                                                                                                                                                                                                            | V    |                  |      |                  |   |
| 59 | AT5G55460<br>(835639)                                        | tmp_5_22468556_T_A:A               | gtccatatca      | T<br>A    | acttatgggt                                        | 3.70±0.24<br>5.92±0.25 | ↓ | 12.11 | 10 <sup>-6</sup> | A |                                                        |                                                                                                                                                                                                                                                                                                                                                                                                                            | Λ    |                  |      |                  |   |
| 60 | AT5G62080<br>(836328)                                        | ENSVATH07464841:A                  | tgtaaactctt     | G<br>A    | tgaactaact                                        | 6.77±0.46<br>4.85±0.28 | ↑ | 7.41  | 10 <sup>-6</sup> | A |                                                        |                                                                                                                                                                                                                                                                                                                                                                                                                            | V    |                  |      |                  |   |
| 61 | DIR1<br>(834904;<br>AT5G48485)                               | ENSVATH14611567:C                  | ttttccattt      | G<br>C    | tagtaaaaga                                        | 2.24±0.20<br>2.97±0.27 | ↓ | 4.33  | 10 <sup>-3</sup> | B |                                                        |                                                                                                                                                                                                                                                                                                                                                                                                                            | Λ    |                  |      |                  |   |
| 62 | EARL1<br>(826860;<br>AT4G12480)                              | ENSVATH02803678:C                  | caaataataat     | A<br>C    | gaacaagttg                                        | 2.80±0.19<br>3.29±0.24 | ↓ | 3.24  | 10 <sup>-2</sup> | C |                                                        |                                                                                                                                                                                                                                                                                                                                                                                                                            | Λ    |                  |      |                  |   |
|    |                                                              | ENSVATH02803680:G                  | aatcaaataat     | A<br>G    | atagaacaag                                        | 2.80±0.19<br>3.29±0.24 |   |       |                  |   |                                                        |                                                                                                                                                                                                                                                                                                                                                                                                                            | 3.24 | 10 <sup>-2</sup> | C    | Λ                |   |
|    |                                                              | ENSVATH06633044:T                  | tgaataatca      | A<br>T    | atataataga                                        | 2.80±0.19<br>1.55±0.11 | ↑ | 11.93 | 10 <sup>-6</sup> | A |                                                        |                                                                                                                                                                                                                                                                                                                                                                                                                            | Λ    |                  |      |                  |   |
|    |                                                              | tmp_4_7407065_T_G:C                | agggcaaata      | A<br>C    | ataaataaac                                        | 2.80±0.19<br>2.51±0.14 |   |       |                  |   |                                                        |                                                                                                                                                                                                                                                                                                                                                                                                                            | 2.54 | 0.05             | D    | V                |   |
| 63 | SESA2<br>(828823;<br>AT4G27150)                              | ENSVATH06783396:T                  | ctataaaaact     | A<br>T    | actcttcact                                        | 2.38±0.15<br>2.76±0.17 | ↓ | 3.43  | 10 <sup>-3</sup> | B |                                                        |                                                                                                                                                                                                                                                                                                                                                                                                                            |      | Λ                |      |                  |   |
|    |                                                              | tmp_4_13609312_A_C:C               | ctcacctata      | A<br>C    | aactaactct                                        | 2.38±0.15<br>3.43±0.23 |   |       |                  |   |                                                        |                                                                                                                                                                                                                                                                                                                                                                                                                            |      |                  | 8.09 | 10 <sup>-6</sup> | A |
|    |                                                              | tmp_4_13609315_C_T:T               | acctataaaa      | A<br>T    | taactcttca                                        | 2.38±0.15<br>2.66±0.17 |   |       |                  |   |                                                        |                                                                                                                                                                                                                                                                                                                                                                                                                            |      |                  | 2.53 | 0.05             | D |
| 64 | SESA3<br>(828824;<br>AT4G27160)                              | tmp_4_13611767_A_T:T               | tcacctataa      | A<br>T    | tacaaacca                                         | 1.69±0.11<br>2.50±0.18 | ↓ | 8.14  | 10 <sup>-6</sup> | A |                                                        |                                                                                                                                                                                                                                                                                                                                                                                                                            | Λ    |                  |      |                  |   |
| 65 | SESA5<br>(835563;<br>AT5G54740)                              | ENSVATH03430640:A                  | tccataaata      | T<br>A    | attcattccc                                        | 2.78±0.24<br>3.82±0.20 | ↓ | 6.27  | 10 <sup>-6</sup> | A |                                                        |                                                                                                                                                                                                                                                                                                                                                                                                                            |      | Λ                |      |                  |   |
|    |                                                              | ENSVATH07420797:C                  | ataaatatat      | T<br>C    | cattcccact                                        | 2.78±0.24<br>3.79±0.13 |   |       |                  |   |                                                        |                                                                                                                                                                                                                                                                                                                                                                                                                            |      |                  | 6.66 | 10 <sup>-6</sup> | A |
|    |                                                              | tmp_5_22239219_T_C:G               | tctcctccat      | A<br>G    | aatatattca                                        | 2.78±0.24<br>3.75±0.28 |   |       |                  |   | 5.27                                                   | 10 <sup>-6</sup>                                                                                                                                                                                                                                                                                                                                                                                                           |      |                  | A    |                  |   |
| 66 | XYP2                                                         | ENSVATH01769305:T                  | caataataat      | A         | tatgaaaaag                                        | 1.98±0.14              | ↓ | 6.70  | 10 <sup>-6</sup> | A |                                                        |                                                                                                                                                                                                                                                                                                                                                                                                                            | Λ    |                  |      |                  |   |

—  
- -  
V

[illegible]

AT3G52770)

curled downward  
leavesemerging leaves were curled downward after 22 days after  
stratification [87]Table S1. *Cont.*

| #                    | <i>A. thaliana</i> gene<br>(Entrez ID [37];<br>TAIR ID [38]) | Candidate SNP marker              |                               |                   | K <sub>D</sub> , nM, MEAN ± SEM, <i>in silico</i> |                        |             |                        |                  | Hand-curated annotation using the PubMed database [39] |                                                             |                                                                                                                                                                                                                                                                                                                                                                                                                                                                                                                                                               | γ                                                                                     |
|----------------------|--------------------------------------------------------------|-----------------------------------|-------------------------------|-------------------|---------------------------------------------------|------------------------|-------------|------------------------|------------------|--------------------------------------------------------|-------------------------------------------------------------|---------------------------------------------------------------------------------------------------------------------------------------------------------------------------------------------------------------------------------------------------------------------------------------------------------------------------------------------------------------------------------------------------------------------------------------------------------------------------------------------------------------------------------------------------------------|---------------------------------------------------------------------------------------|
|                      |                                                              | TAIR SNP ID [38]: minor<br>allele | 5' flank, 10 bp               | WT<br>min         | 3 flank, 10 bp                                    | WT<br>min              | Δ           | Z                      | P                | Q                                                      | economically<br>valuable traits                             | Effect on this trait ("Y": "Λ" as improved; "V" as impaired) within plant<br>breeding models using <i>Arabidopsis thaliana</i> [Ref]                                                                                                                                                                                                                                                                                                                                                                                                                          |                                                                                       |
| 72                   | ZTL<br>(835842,<br>AT5G57360)                                | ENSVATH03444105:T                 | tcaacttttt                    | C<br>T            | aataagttgg                                        | 4.39±0.24<br>3.13±0.16 | ↑           | 9.07                   | 10 <sup>-6</sup> | A                                                      | circadian period,<br>hypocotyl<br>length, flowering<br>time | within plant development models using <i>Arabidopsis thaliana</i> transfected<br>with plasmid carrying one more ZTL gene copy: ZTL overexpression may<br>be a molecular marker for prolonged circadian period, increased length of<br>hypocotyl, delayed flowering time [88]                                                                                                                                                                                                                                                                                  | V                                                                                     |
|                      |                                                              | ENSVATH07439752:A                 | agatttttaat                   | G<br>A            | acatttttcc                                        | 4.39±0.24<br>3.39±0.20 |             |                        |                  |                                                        |                                                             |                                                                                                                                                                                                                                                                                                                                                                                                                                                                                                                                                               |                                                                                       |
|                      |                                                              | 73                                | ZW18<br>(842204<br>AT1G58350) | ENSVATH13630240:G | ccgtgaatat                                        | A<br>G                 | tttttagcatc | 3.71±0.24<br>4.30±0.27 | ↓                | 3.28                                                   | 10 <sup>-2</sup>                                            | C                                                                                                                                                                                                                                                                                                                                                                                                                                                                                                                                                             | plant<br>susceptibility<br>to parasites,<br>parasite<br>reprogramm<br>g of host-plant |
| tmp_1_21667503_A_C:G | tcaaatctttt                                                  |                                   |                               | T<br>G            | accgtacgaa                                        | 3.71±0.24<br>7.73±0.50 |             |                        |                  |                                                        |                                                             |                                                                                                                                                                                                                                                                                                                                                                                                                                                                                                                                                               |                                                                                       |
| ENSVATH01393400:T    | tatatatttag                                                  |                                   |                               | C<br>T            | atcaaatga                                         | 3.71±0.24<br>2.91±0.22 | ↑           | 4.81                   | 10 <sup>-3</sup> | B                                                      |                                                             |                                                                                                                                                                                                                                                                                                                                                                                                                                                                                                                                                               |                                                                                       |
| ENSVATH04993568:A    | aagatgccgt                                                   |                                   |                               | G<br>A            | aatataatttt                                       | 3.71±0.24<br>2.96±0.20 |             |                        |                  |                                                        |                                                             |                                                                                                                                                                                                                                                                                                                                                                                                                                                                                                                                                               |                                                                                       |
| tmp_1_21667676_G_T:A | gaagatatat                                                   |                                   |                               | C<br>A            | gacttgataa                                        | 3.71±0.24<br>2.27±0.23 | ↑           | 8.31                   | 10 <sup>-6</sup> | A                                                      |                                                             |                                                                                                                                                                                                                                                                                                                                                                                                                                                                                                                                                               |                                                                                       |
| tmp_1_21667691_G_T:A | atttttagcat                                                  |                                   |                               | C<br>A            | aatgaagat                                         | 3.71±0.24<br>3.29±0.19 |             |                        |                  |                                                        |                                                             |                                                                                                                                                                                                                                                                                                                                                                                                                                                                                                                                                               |                                                                                       |
| 74                   | ZYP1a<br>(838831,<br>AT1G22260)                              | tmp_1_7865301_A_G:C               | ttctccggtg                    | T<br>C            | aaaagaccac                                        | 2.33±0.16<br>4.46±0.29 | ↓           | 14.00                  | 10 <sup>-6</sup> | A                                                      | plant<br>recombination,<br>meiosis, fertility               | within plant recombination models using T-DNA-based ZYP1a-knockout<br><i>Arabidopsis thaliana</i> (ecotype Columbia): meiotic defects reducing fertility<br>[90]<br>as a heuristic contrast to articles only on various loss-of-function variants of<br>the plant <i>ZYP1a</i> and <i>ZYP1b</i> genes that we could find in the current state of<br>the PubMed database, which report meiotic defects reducing fertility in such<br>plants [90]: excess ZYP1a might hypothetically contribute to the<br>maintenance of normal meiosis and fertility in plants | V                                                                                     |
|                      |                                                              | ENSVATH01087323:T                 | tgctagggtt                    | G<br>T            | cgtttatgaa                                        | 5.22±0.27<br>4.73±0.26 |             |                        |                  |                                                        |                                                             |                                                                                                                                                                                                                                                                                                                                                                                                                                                                                                                                                               |                                                                                       |
|                      |                                                              | ENSVATH11780374:A                 | ttgttcttcc                    | G<br>A            | aatagtttagc                                       | 5.22±0.27<br>4.64±0.33 | ↑           | 2.59                   | 10 <sup>-2</sup> | C                                                      |                                                             |                                                                                                                                                                                                                                                                                                                                                                                                                                                                                                                                                               |                                                                                       |
| 75                   | ZYP1b<br>(838834,<br>AT1G22275)                              | ENSVATH11780638:G                 | cggataaat                     | A<br>G            | actttatttc                                        | 2.21±0.14<br>2.55±0.17 | ↓           | 2.98                   | 10 <sup>-2</sup> | C                                                      | plant<br>recombination,<br>meiosis, fertility               | within plant recombination models using T-DNA-based ZYP1b-knockout<br><i>Arabidopsis thaliana</i> (ecotype Columbia): meiotic defects reducing fertility<br>[90]<br>as a heuristic contrast to articles only on various loss-of-function variants of<br>the plant <i>ZYP1a</i> and <i>ZYP1b</i> genes that we could find in the current state of<br>the PubMed database, which report meiotic defects reducing fertility in such<br>plants [90]: excess ZYP1a might hypothetically contribute to the<br>maintenance of normal meiosis and fertility in plants | V                                                                                     |
|                      |                                                              | tmp_1_7867104_A_G:G               | cttcatcggt                    | A<br>G            | taaataactt                                        | 2.21±0.14<br>4.35±0.27 |             |                        |                  |                                                        |                                                             |                                                                                                                                                                                                                                                                                                                                                                                                                                                                                                                                                               |                                                                                       |
|                      |                                                              | ENSVATH04622206:C                 | cagattgaaa                    | T<br>C            | gtagctcggt                                        | 8.52±0.32<br>6.38±0.41 | ↑           | 7.81                   | 10 <sup>-6</sup> | A                                                      |                                                             |                                                                                                                                                                                                                                                                                                                                                                                                                                                                                                                                                               |                                                                                       |
|                      |                                                              | ENSVATH04622207:A                 | agattgaaat                    | G<br>A            | tagctcggtg                                        | 8.52±0.32<br>4.64±0.36 |             |                        |                  |                                                        |                                                             |                                                                                                                                                                                                                                                                                                                                                                                                                                                                                                                                                               |                                                                                       |
|                      |                                                              | ENSVATH11780637:A                 | gcgatattct                    | G<br>A            | agtctctgac                                        | 9.29±0.60<br>6.55±0.34 | ↑           | 14.04                  | 10 <sup>-6</sup> | A                                                      |                                                             |                                                                                                                                                                                                                                                                                                                                                                                                                                                                                                                                                               |                                                                                       |

|                     |            |        |            |                        |                         |
|---------------------|------------|--------|------------|------------------------|-------------------------|
| tmp_1_7867030_G_A:A | cgttgatcat | G<br>A | ccaagtggcc | 9.29±0.60<br>8.20±0.52 | 2.76 10 <sup>-2</sup> C |
|---------------------|------------|--------|------------|------------------------|-------------------------|

Table S1. Cont.

| #  | <i>A. thaliana</i> gene<br>(Entrez ID [37];<br>TAIR ID [38]) | Candidate SNP marker              |                 |            | K <sub>D</sub> , nM, MEAN ± SEM, <i>in silico</i> |                        |                        |                  |                  | Hand-curated annotation using the PubMed database [39] |                                                                   |                                                                                                                                                                                                                                                                                                                                                                                                                                                                                            |                                                                                                                                                            | Y                                                                                                                                                                                               |
|----|--------------------------------------------------------------|-----------------------------------|-----------------|------------|---------------------------------------------------|------------------------|------------------------|------------------|------------------|--------------------------------------------------------|-------------------------------------------------------------------|--------------------------------------------------------------------------------------------------------------------------------------------------------------------------------------------------------------------------------------------------------------------------------------------------------------------------------------------------------------------------------------------------------------------------------------------------------------------------------------------|------------------------------------------------------------------------------------------------------------------------------------------------------------|-------------------------------------------------------------------------------------------------------------------------------------------------------------------------------------------------|
|    |                                                              | TAIR SNP ID [38]: minor<br>allele | 5' flank, 10 bp | WT<br>min  | 3 flank, 10 bp                                    | WT<br>min              | Δ                      | Z                | p                | Q                                                      | economically<br>valuable traits                                   | Effect on this trait ("Y: "N" as improved; "V" as impaired) within plant<br>breeding models using <i>Arabidopsis thaliana</i> [Ref]                                                                                                                                                                                                                                                                                                                                                        |                                                                                                                                                            |                                                                                                                                                                                                 |
| 77 | ZFN1<br>(821230<br>AT3G02830)                                | ENSVATH10461609:A                 | catattcgtc      | T<br>A     | acgtacatac                                        | 3.33±0.26<br>3.94±0.21 | ↓                      | 3.56             | 10 <sup>-3</sup> | B                                                      | fruit ripening,<br>sucrose content                                | within plant fruit ripening models using the strawberry ( <i>Fragaria x<br/>ananassa</i> ) mutants: FaZFN1 deficit along with reduced sucrose content [91]                                                                                                                                                                                                                                                                                                                                 | V                                                                                                                                                          |                                                                                                                                                                                                 |
|    | tmp_3_613745_T_G:G                                           | ttcgtctacg                        | T<br>G          | acatacacaa | 3.33±0.26<br>5.30±0.23                            | 10.48                  |                        |                  |                  |                                                        |                                                                   |                                                                                                                                                                                                                                                                                                                                                                                                                                                                                            |                                                                                                                                                            | 10 <sup>-6</sup>                                                                                                                                                                                |
| 78 | ZFN2<br>(817855<br>AT2G32930)                                | ENSVATH07908096:C                 | aatttattaa      | T<br>C     | ccgtacacgg                                        |                        | 3.88±0.28<br>4.39±0.31 | ↓                | 2.45             | 0.05                                                   | D                                                                 | fruit ripening,<br>sucrose content                                                                                                                                                                                                                                                                                                                                                                                                                                                         | within plant fruit ripening models using the strawberry ( <i>Fragaria x<br/>ananassa</i> ) mutants: FaZFN2 deficit along with reduced sucrose content [91] |                                                                                                                                                                                                 |
| 79 | ZFN3<br>(831516,<br>AT5G16540)                               | ENSVATH06976768:G                 | catacatact      | A<br>G     | accaaatacag                                       | 2.71±0.21<br>3.21±0.24 | ↓                      | 3.19             | 10 <sup>-2</sup> | C                                                      | flower<br>development,<br>flowering time                          | according to the only article that we could find in the current state of the<br>PubMed database, which has empirically concluded based on the combined<br>analysis of gene expression data of <i>Arabidopsis thaliana</i> development in<br>comparison with plant gene phylogeny in both <i>Arabidopsis thaliana</i> and<br><i>Oryza sativa</i> : ZFN3 excess and deficit might positive and negative effect,<br>respectively, on both flower development and on flowering time [92]       | V<br>--<br>Λ                                                                                                                                               |                                                                                                                                                                                                 |
|    | ENSVATH06976772:C                                            | tagttttttt                        | T<br>C          | ctttcttttg | 7.19±0.33<br>6.68±0.33                            | ↑                      |                        |                  |                  |                                                        |                                                                   |                                                                                                                                                                                                                                                                                                                                                                                                                                                                                            |                                                                                                                                                            | 2.17                                                                                                                                                                                            |
| 80 | ZFP10<br>(818351,<br>AT2G37740)                              | ENSVATH13564244:C                 | tttaatttc       | T<br>C     | ttttatataa                                        | 1.88±0.12<br>2.10±0.13 | ↓                      | 2.39             | 0.05             | D                                                      | plant growth,<br>dwarfing, leaf<br>development,<br>flowering time | as a heuristic contrast to the only article that we could find in the current<br>state of the PubMed database, which reports about plant development<br>models using transgenic both <i>Arabidopsis thaliana</i> and Tobacco, which<br>overexpress ZFP10 along with dwarfing, abnormal leafs and flowering as<br>early as higher ZFP10 abundance: ZFP10 deficit might hypothetically<br>contribute to the maintenance of normal plant growth, leafs development<br>and flowering time [93] | Λ                                                                                                                                                          |                                                                                                                                                                                                 |
| 81 | ZFP11<br>(818842,<br>AT2G42410)                              | ENSVATH01980798:A                 | tttatttttt      | T<br>A     | aaataatttc                                        | 3.58±0.17<br>4.21±0.19 | ↓                      | 4.90             | 10 <sup>-6</sup> | A                                                      | stem<br>elongation, leaf<br>shape, fertility,<br>sterility        | as a heuristic contrast to the only article that we could find in the current<br>state of the PubMed database, which reports about plant development<br>models using transgenic both <i>Arabidopsis thaliana</i> and Tobacco, which<br>overexpress ZFP11 along with reduced stem elongation, abnormal leaf<br>shape, and sterility: ZFP11 deficit might hypothetically contribute to the<br>maintenance of normal stem elongation, leaf shape, and fertility [94]                          | Λ                                                                                                                                                          |                                                                                                                                                                                                 |
|    |                                                              | ENSVATH05703253:C                 | tttttttaaa      | T<br>C     | aatttccact                                        | 3.58±0.17<br>4.28±0.22 |                        |                  |                  |                                                        |                                                                   |                                                                                                                                                                                                                                                                                                                                                                                                                                                                                            |                                                                                                                                                            | 5.06                                                                                                                                                                                            |
|    |                                                              | ENSVATH13618097:C                 | attttatttt      | T<br>C     | ttaaataatt                                        | 3.58±0.17<br>3.85±0.21 | 2.02                   | 0.05             | D                |                                                        |                                                                   |                                                                                                                                                                                                                                                                                                                                                                                                                                                                                            |                                                                                                                                                            |                                                                                                                                                                                                 |
|    |                                                              | ENSVATH05703252:T                 | ttattttttt      | A<br>T     | aataatttcc                                        | 3.58±0.17<br>3.31±0.18 |                        |                  |                  | 2.16                                                   |                                                                   | 0.05                                                                                                                                                                                                                                                                                                                                                                                                                                                                                       | D                                                                                                                                                          |                                                                                                                                                                                                 |
|    |                                                              | ENSVATH14608579:T                 | tattttttta      | A<br>T     | ataatttcca                                        | 3.58±0.17<br>1.89±0.11 | 16.84                  | 10 <sup>-6</sup> | A                |                                                        |                                                                   |                                                                                                                                                                                                                                                                                                                                                                                                                                                                                            |                                                                                                                                                            |                                                                                                                                                                                                 |
|    |                                                              | tmp_2_17657744_A_ATT:T            | tttttatttt      | A<br>T     | tttttttaaa                                        | 3.58±0.17<br>3.32±0.17 |                        |                  |                  | 2.15                                                   |                                                                   | 0.95                                                                                                                                                                                                                                                                                                                                                                                                                                                                                       | D                                                                                                                                                          | within plant development models using transgenic both <i>Arabidopsis<br/>thaliana</i> and Tobacco, which overexpress ZFP11: reduced stem elongation,<br>abnormal leaf shape, and sterility [94] |
| 82 | ZFP2<br>(835856,                                             | ENSVATH07440609:T                 | tagaaaaagg      | C<br>T     | atacattaac                                        | 4.47±0.15<br>3.96±0.24 | ↑                      | 3.52             | 10 <sup>-3</sup> |                                                        | B                                                                 |                                                                                                                                                                                                                                                                                                                                                                                                                                                                                            |                                                                                                                                                            |                                                                                                                                                                                                 |

AT5G57520)

flower  
morphology,  
pollination,  
fertilityparts with changes in morphology that reduced both pollination and fertility  
[95]

Table S1. Cont.

| #  | <i>A. thaliana</i> gene<br>(Entrez ID [37];<br>TAIR ID [38]) | Candidate SNP marker              |                 |           |                | K <sub>D</sub> , nM, MEAN ± SEM, <i>in silico</i> |   |       |                  | Hand-curated annotation using the PubMed database [39] |                                                                                           |                                                                                                                                                                                                                                                                                                                                                                                                                                    | γ |
|----|--------------------------------------------------------------|-----------------------------------|-----------------|-----------|----------------|---------------------------------------------------|---|-------|------------------|--------------------------------------------------------|-------------------------------------------------------------------------------------------|------------------------------------------------------------------------------------------------------------------------------------------------------------------------------------------------------------------------------------------------------------------------------------------------------------------------------------------------------------------------------------------------------------------------------------|---|
|    |                                                              | TAIR SNP ID [38]: minor<br>allele | 5' flank, 10 bp | WT<br>min | 3 flank, 10 bp | WT<br>min                                         | Δ | Z     | P                | Q                                                      | economically<br>valuable traits                                                           | Effect on this trait (‘Y’: ‘^’ as improved; ‘V’ as impaired) within plant<br>breeding models using <i>Arabidopsis thaliana</i> [Ref]                                                                                                                                                                                                                                                                                               |   |
| 83 | ZFP3<br>(832587,<br>AT5G25160)                               | ENSVATH07038344:A                 | cacacttaat      | G<br>A    | tatttggttg     | 4.99±0.26<br>2.62±0.15                            |   | 16.31 | 10 <sup>-6</sup> | A                                                      |                                                                                           |                                                                                                                                                                                                                                                                                                                                                                                                                                    |   |
|    |                                                              | ENSVATH07038345:A                 | ttaatgtatt      | T<br>A    | gttgactat      | 4.99±0.26<br>3.38±0.22                            |   | 9.34  | 10 <sup>-6</sup> | A                                                      | semidwarf<br>growth habit,<br>fertility, light<br>sensitivity,<br>hypocotyl<br>elongation | within plant development models using transgenic <i>Arabidopsis thaliana</i><br>overexpressing ZFP3: semidwarf growth habit, defects in fertility, and<br>enhanced sensitivity of hypocotyl elongation to red but not to far-red or<br>blue light [96]                                                                                                                                                                             | V |
|    |                                                              | ENSVATH11025805:G                 | tacacactta      | A<br>G    | tgtatttgtt     | 4.99±0.26<br>4.36±0.25                            | ↑ | 3.45  | 10 <sup>-3</sup> | B                                                      |                                                                                           |                                                                                                                                                                                                                                                                                                                                                                                                                                    |   |
|    |                                                              | tmp_5_8687115_C_A:A               | ccaaataaat      | C<br>A    | tgaaccggaa     | 4.99±0.26<br>4.08±0.18                            |   | 5.80  | 10 <sup>-6</sup> | A                                                      |                                                                                           |                                                                                                                                                                                                                                                                                                                                                                                                                                    |   |
|    |                                                              | tmp_5_8687157_T_A:A               | acacacttaa      | T<br>A    | gtatttgttg     | 4.99±0.26<br>3.64±0.21                            |   | 8.09  | 10 <sup>-6</sup> | A                                                      |                                                                                           |                                                                                                                                                                                                                                                                                                                                                                                                                                    |   |
| 84 | ZFP4<br>(842928,<br>AT1G66140)                               | ENSVATH01479027:A                 | tacatgatta      | T<br>A    | atgtattttt     | 2.65±0.17<br>3.89±0.19                            | ↓ | 9.32  | 10 <sup>-6</sup> | A                                                      | hypersensitivity<br>to abscisic acid,<br>germination                                      | within plant development models using T-DNA-based double ZFP3-ZFP4<br>knockout <i>Arabidopsis thaliana</i> treated with abscisic acid: hypersensitivity<br>to abscisic acid reducing germination efficiency [96]                                                                                                                                                                                                                   | V |
|    |                                                              | tmp_1_24622162_A_T:A              | cttacatgat      | T<br>A    | atatgtattt     | 2.65±0.17<br>3.89±0.19                            |   | 9.38  | 10 <sup>-6</sup> | A                                                      |                                                                                           |                                                                                                                                                                                                                                                                                                                                                                                                                                    |   |
|    |                                                              | ENSVATH01479026:A                 | atgattatat      | G<br>A    | tattttttatt    | 2.65±0.17<br>1.64±0.13                            | ↑ | 9.21  | 10 <sup>-6</sup> | A                                                      | hypocotyl<br>lengths, seedlings<br>development                                            | within plant development models using transgenic <i>Arabidopsis thaliana</i><br>overexpressing ZFP4: reduced hypocotyl lengths of germinated seedlings<br>[96]                                                                                                                                                                                                                                                                     | V |
| 85 | ZFP5<br>(837588,<br>AT1G10480)                               | tmp_1_3449540_A_T:T               | catgactaat      | A<br>T    | taaaaaaccc     | 1.84±0.12<br>2.59±0.17                            | ↓ | 7.32  | 10 <sup>-6</sup> | A                                                      | trichome number                                                                           | within plant development models using ZFP5 loss-of-function mutant<br><i>Arabidopsis thaliana</i> : a reduced number of trichomes on sepals, cauline<br>leaves, paracletes, and main inflorescence stems [97]                                                                                                                                                                                                                      | V |
|    |                                                              | tmp_1_3449548_C_AT:T              | atataaaaaa      | C<br>T    | ccttcataca     | 1.84±0.12<br>2.07±0.13                            |   | 2.54  | 0.05             | D                                                      |                                                                                           |                                                                                                                                                                                                                                                                                                                                                                                                                                    |   |
| 86 | ZFP7<br>(839077,<br>AT1G24625)                               | tmp_1_8727258_T_C:G               | agacactttt      | A<br>G    | ttctcccatg     | 4.39±0.23<br>5.68±0.31                            | ↓ | 6.74  | 10 <sup>-6</sup> | A                                                      | hypocotyl<br>lengths, seedlings<br>development                                            | as a heuristic contrast to the only article that we could find in the<br>current state of the PubMed database, which reports about plant<br>development models using transgenic <i>Arabidopsis thaliana</i><br>overexpressing ZFP7 along with reduced hypocotyl lengths of<br>germinated seedlings: ZFP7 deficit might hypothetically contribute to<br>the maintenance of normal hypocotyl lengths of germinated seedlings<br>[96] | ^ |
|    |                                                              | tmp_1_8727262_A_G:C               | tggcagacac      | T<br>C    | tttatttctcc    | 4.39±0.23<br>5.68±0.31                            |   | 6.74  | 10 <sup>-6</sup> | A                                                      |                                                                                           |                                                                                                                                                                                                                                                                                                                                                                                                                                    |   |
| 87 | ZFP8<br>(818794,<br>AT2G41940)                               | ENSVATH05701009:G                 | tctaataatac     | T<br>G    | aatgaaaaaa     | 3.65±0.24<br>4.09±0.19                            | ↓ | 2.83  | 10 <sup>-2</sup> | C                                                      | trichome density                                                                          | within plant development models using ZFP8 loss-of-function mutant<br><i>Arabidopsis thaliana</i> : reduced trichome density on upper cauline leaves<br>and branches [98]                                                                                                                                                                                                                                                          | V |
| 88 | ZIF1<br>(831219,<br>AT5G13740)                               | ENSVATH03054081:T                 | tcttaataatac    | C<br>T    | agttttttaat    | 3.65±0.16<br>2.83±0.18                            |   | 6.65  | 10 <sup>-6</sup> | A                                                      | Zn tolerance, Zn<br>retention in roots,<br>interveinal leaf<br>chlorosis                  | within plant development models using <i>Arabidopsis thaliana</i><br>overexpressing ZIF1: increased Zn tolerance leading Zn retention in roots<br>along with interveinal leaf chlorosis [99]                                                                                                                                                                                                                                       | V |
|    |                                                              | ENSVATH03054083:G                 | cagtttttta      | T<br>G    | tacaaattac     | 3.65±0.16<br>3.20±0.20                            | ↑ | 3.44  | 10 <sup>-3</sup> | B                                                      |                                                                                           |                                                                                                                                                                                                                                                                                                                                                                                                                                    |   |
|    |                                                              | ENSVATH06963789:T                 | atcttttttta     | A<br>T    | aaaaaatatg     | 3.79±0.19<br>2.41±0.16                            |   | 10.85 | 10 <sup>-6</sup> | A                                                      |                                                                                           |                                                                                                                                                                                                                                                                                                                                                                                                                                    |   |



|                     |            |        |            |                        |                       |   |
|---------------------|------------|--------|------------|------------------------|-----------------------|---|
| tmp_5_4432222_C_A:A | tcggactata | C<br>A | aattaatatc | 3.65±0.16<br>2.81±0.18 | 6.77 10 <sup>-6</sup> | A |
| tmp_5_4432295_A_T:T | tcttttttaa | A<br>T | aaaaatatgt | 3.79±0.19<br>2.86±0.16 | 7.50 10 <sup>-6</sup> | A |

Table S1. Cont.

| #  | <i>A. thaliana</i> gene<br>(Entrez ID [37];<br>TAIR ID [38]) | Candidate SNP marker              |                 |           | K <sub>D</sub> , nM, MEAN ± SEM, <i>in silico</i> |                        |   |       |                  | Hand-curated annotation using the PubMed database [39] |                                                                                                                |                                                                                                                                                                                                                                                                                                       | Υ |
|----|--------------------------------------------------------------|-----------------------------------|-----------------|-----------|---------------------------------------------------|------------------------|---|-------|------------------|--------------------------------------------------------|----------------------------------------------------------------------------------------------------------------|-------------------------------------------------------------------------------------------------------------------------------------------------------------------------------------------------------------------------------------------------------------------------------------------------------|---|
|    |                                                              | TAIR SNP ID [38]: minor<br>allele | 5' flank, 10 bp | WT<br>min | 3 flank, 10 bp                                    | WT<br>min              | Δ | Z     | P                | Q                                                      | economically<br>valuable traits                                                                                | Effect on this trait (Υ: "Λ" as improved; "V" as impaired) within<br>plant breeding models using <i>Arabidopsis thaliana</i> [Ref]                                                                                                                                                                    |   |
| 89 | ZIFL1<br>(831220,<br>AT5G13750)                              | ENSVATH14020110:C                 | atcatcatca      | T<br>C    | attataaaaa                                        | 1.87±0.12<br>2.19±0.14 | ↓ | 3.46  | 10 <sup>-3</sup> | B                                                      | root length, cobalt<br>sensitivity                                                                             | within plant development models using <i>Arabidopsis thaliana</i> carrying<br>disrupted <i>ZIFL1</i> gene: reduced root length and decreased sensitivity to<br>inhibitory cobalt [100]                                                                                                                | V |
|    |                                                              | tmp_5_4437787_T_G:G               | catcatatta      | T<br>G    | aaaaatggtg                                        | 1.87±0.12<br>3.96±0.35 |   | 14.00 | 10 <sup>-6</sup> | A                                                      |                                                                                                                |                                                                                                                                                                                                                                                                                                       |   |
| 90 | ZIFL2<br>(823490,<br>AT3G43790)                              | ENSVATH02391036:T                 | aataattatc      | C<br>T    | taaaaacaa                                         | 6.10±0.38<br>5.03±0.26 | ↑ | 4.76  | 10 <sup>-3</sup> | B                                                      | resistance to cation<br>cesium toxicity,<br>potassium<br>responsiveness, plant<br>growth, plant<br>development | within plant development models using T-DNA-based <i>ZIFL1</i> -<br>knockout <i>Arabidopsis thaliana</i> : reduced sensitivity to cation cesium as<br>toxic for plant, as well as improved responsiveness to potassium as an<br>essential mineral nutrient for plant growth and development [101]     | Λ |
|    |                                                              | ENSVATH06184766:T                 | caacaccact      | G<br>T    | agatatTTTA                                        | 5.00±0.30<br>4.25±0.24 |   | 3.95  | 10 <sup>-3</sup> | B                                                      |                                                                                                                |                                                                                                                                                                                                                                                                                                       |   |
|    |                                                              | ENSVATH06184768:T                 | tatttgccgc      | C<br>T    | tttagaataa                                        | 6.10±0.38<br>5.22±0.31 |   | 3.64  | 10 <sup>-3</sup> | B                                                      |                                                                                                                |                                                                                                                                                                                                                                                                                                       |   |
|    |                                                              | ENSVATH14318785:T                 | aattttgttt      | G<br>T    | taaaacaaca                                        | 5.00±0.30<br>4.53±0.22 |   | 2.56  | 0.05             | D                                                      |                                                                                                                |                                                                                                                                                                                                                                                                                                       |   |
|    |                                                              | ENSVATH14318786:A                 | gatattttat      | T<br>A    | tggttctctt                                        | 5.00±0.30<br>2.88±0.19 |   | 12.47 | 10 <sup>-6</sup> | A                                                      |                                                                                                                |                                                                                                                                                                                                                                                                                                       |   |
|    |                                                              | tmp_3_15655250_T_G:G              | aaaattttgt      | T<br>G    | tgtaaaacaa                                        | 5.00±0.30<br>4.49±0.29 |   | 2.48  | 0.05             | D                                                      |                                                                                                                |                                                                                                                                                                                                                                                                                                       |   |
|    |                                                              | tmp_3_15655356_A_T:T              | tccgaagaaa      | A<br>T    | taattatcct                                        | 6.10±0.38<br>5.63±0.29 |   | 1.98  | 0.05             | D                                                      |                                                                                                                |                                                                                                                                                                                                                                                                                                       |   |
| 91 | ZIGA4<br>(837390,<br>AT1G08680)                              | ENSVATH01025652:A                 | agaaaaggag      | T<br>A    | attaatggaa                                        | 2.58±0.19<br>4.52±0.30 | ↓ | 11.32 | 10 <sup>-6</sup> | A                                                      | drought stress<br>response                                                                                     | within plant stress-response models using rice ( <i>Oryza sativa</i> L.) under<br>drought stress in comparison with a norm by means of whole-<br>genome transcriptome profiling (i.e., RNA-Seq data): ZIGA4<br>downregulation may be a molecular marker for plant response to<br>drought stress [102] | Λ |
|    |                                                              | tmp_1_2762564_G_C:C               | gagtattaat      | G<br>C    | gaaaacatgt                                        | 2.58±0.19<br>3.03±0.22 |   | 3.08  | 10 <sup>-2</sup> | C                                                      |                                                                                                                |                                                                                                                                                                                                                                                                                                       |   |
| 92 | ZIP1<br>(820457,<br>AT3G12750)                               | tmp_3_4053228_C_TCT:A             | tctataaaaa      | G<br>A    | ctcctctttc                                        | 2.12±0.14<br>2.32±0.15 | ↓ | 2.02  | 0.05             | D                                                      | plant stress response,<br>Zn-toxicity stress                                                                   | within plant stress response models using a mutant line of<br><i>Arabidopsis thaliana</i> with a vacuolar membrane defect sensitive to<br>zinc: the expression level of ZIP1 was markedly reduced, to 30% of the<br>control, as plant response to Zn-toxicity stress [103]                            | Λ |
|    |                                                              | tmp_3_4053233_T_A:T               | ttctctctat      | A<br>T    | aaaagctcct                                        | 2.12±0.14<br>2.75±0.18 |   | 5.76  | 10 <sup>-6</sup> | A                                                      |                                                                                                                |                                                                                                                                                                                                                                                                                                       |   |
| 93 | ZIP10<br>(840014,<br>AT1G31260)                              | ENSVATH14930063:C                 | ttgtcttata      | T<br>C    | aagaagatta                                        | 1.69±0.13<br>2.74±0.18 | ↓ | 9.41  | 10 <sup>-6</sup> | A                                                      | plant stress<br>response, high-salt<br>stress                                                                  | within plant stress response models using mature <i>Arabidopsis<br/>thaliana</i> (ecotype Columbia) shoot tissue from salt-treated plants:<br><i>ZIP10</i> downregulation is a molecular marker for plant response to<br>high-salt stress [104]                                                       | Λ |
| 94 | ZIP11<br>(842041,<br>AT1G55910)                              | ENSVATH04513629:A                 | ttatttaatt      | G<br>T    | tattaagatg                                        | 2.78±0.18<br>2.49±0.14 | ↓ | 2.55  | 10 <sup>-6</sup> | A                                                      | plant-environment<br>response,<br>environmental iron<br>(Fe) deficit                                           | within plant-environment response models using rice ( <i>Oryza<br/>sativa</i> ): <i>ZIP11</i> upregulation may be a molecular marker for plant<br>response to environmental iron (Fe) deficit rather than those for<br>zinc (Zn), copper (Cu) and manganese (Mn) [105]                                | Λ |
| 95 | ZIP2<br>(836071)                                             | ENSVATH03453066:C                 | tatgtacttt      | T<br>C    | tgtagtacia                                        | 3.33±0.21<br>4.38±0.26 | ↓ | 6.27  | 10 <sup>-6</sup> | A                                                      | plant development,<br>severe leaf chlorosis,                                                                   | within plant development models using <i>Arabidopsis thaliana</i><br>defective in Zn/Fe-transport system under Zn/Fe deficit stress : ZIP2                                                                                                                                                            | V |

|            |                                                                                             |                                                                                                                                                                                                                                                                                                                            |
|------------|---------------------------------------------------------------------------------------------|----------------------------------------------------------------------------------------------------------------------------------------------------------------------------------------------------------------------------------------------------------------------------------------------------------------------------|
| AT5G59520) | lethality in soil, defective leaves, defective stems, defective roots, Zn/Fe deficit stress | downregulation in roots along with severe leaf chlorosis and lethality in soil as well as reduced chloroplast thylakoid stacking into grana, lack of palisade parenchyma differentiation in leaves, reduced number of vascular bundles in stems, irregular patterns of enlarged endodermal and cortex cells in roots [106] |
|------------|---------------------------------------------------------------------------------------------|----------------------------------------------------------------------------------------------------------------------------------------------------------------------------------------------------------------------------------------------------------------------------------------------------------------------------|

Table S1. Cont.

| #   | <i>A. thaliana</i> gene<br>(Entrez ID [37];<br>TAIR ID [38]) | Candidate SNP marker              |                 |           | K <sub>D</sub> , nM, MEAN ± SEM, <i>in silico</i> |                        |   |       |                  | Hand-curated annotation using the PubMed database [39] |                                                                                                                                             |                                                                                                                                                                                                                                                                                                                                                                                    |   |       |                  |   |
|-----|--------------------------------------------------------------|-----------------------------------|-----------------|-----------|---------------------------------------------------|------------------------|---|-------|------------------|--------------------------------------------------------|---------------------------------------------------------------------------------------------------------------------------------------------|------------------------------------------------------------------------------------------------------------------------------------------------------------------------------------------------------------------------------------------------------------------------------------------------------------------------------------------------------------------------------------|---|-------|------------------|---|
|     |                                                              | TAIR SNP ID [38]: minor<br>allele | 5' flank, 10 bp | WT<br>min | 3 flank, 10 bp                                    | WT<br>min              | Δ | Z     | P                | Q                                                      | economically<br>valuable traits                                                                                                             | Effect on this trait ("Y": "Λ" as improved; "V" as impaired) within<br>plant breeding models using <i>Arabidopsis thaliana</i> [Ref]                                                                                                                                                                                                                                               | Y |       |                  |   |
| 96  | ZIP4<br>(842113,<br>AT1G56590)                               | tmp_1_21204893_A_T:A              | ttaaaaacta      | T<br>A    | agaaggccca                                        | 3.31±0.23<br>4.12±0.17 | ↓ | 5.45  | 10 <sup>-6</sup> | A                                                      | plant development,<br>amyloplasts,<br>vacuolar<br>membrane,<br>endodermis,<br>inflorescence stems                                           | within plant development models using transgenic ZIP4 loss-of-function<br><i>Arabidopsis thaliana</i> : abnormal amyloplasts and defective vacuolar<br>membrane in living endodermal cells of inflorescence stems [107]                                                                                                                                                            | V |       |                  |   |
|     |                                                              | tmp_1_21204897_T_C:G              | aacgttaaaa      | A<br>G    | ctatagaag                                         | 3.31±0.23<br>4.25±0.30 |   |       |                  |                                                        |                                                                                                                                             |                                                                                                                                                                                                                                                                                                                                                                                    |   | 5.13  | 10 <sup>-6</sup> | A |
| 97  | ZIP5<br>(837029<br>AT1G05300)                                | ENSVATH01014951:T                 | agtatataat      | A<br>T    | taacaaaaaa                                        | 1.56±0.10<br>1.72±0.13 | ↓ | 13.53 | 10 <sup>-6</sup> | A                                                      | cadmium (Cd)<br>tolerance, seed<br>mineral<br>concentrations                                                                                | within plant seed development models using ZIP5 knockout <i>Arabidopsis<br/>thaliana</i> : increased tolerance to cadmium (Cd) and decreased seed<br>mineral concentrations [108]                                                                                                                                                                                                  | V |       |                  |   |
|     |                                                              | ENSVATH04523437:G                 | atattaaagt      | A<br>G    | tataatataa                                        | 1.56±0.10<br>2.59±0.09 |   |       |                  |                                                        |                                                                                                                                             |                                                                                                                                                                                                                                                                                                                                                                                    |   | 11.03 | 10 <sup>-6</sup> | A |
|     |                                                              | ENSVATH10632198:A                 | catattaaag      | T<br>A    | atataatat                                         | 1.56±0.10<br>2.60±0.17 |   |       |                  |                                                        |                                                                                                                                             |                                                                                                                                                                                                                                                                                                                                                                                    |   |       |                  |   |
| 98  | ZIP9<br>(829439<br>AT4G33020)                                | ENSVATH06815813:A                 | ccttggttaac     | G<br>A    | tacgtgcacg                                        | 5.00±0.23<br>4.15±0.23 | ↓ | 5.09  | 10 <sup>-6</sup> | A                                                      | stress response;<br>iron (Fe) deficiency<br>stress                                                                                          | within plant stress response models using <i>Arabidopsis thaliana</i> under<br>iron (Fe) deficient growth conditions: ZIP9 upregulation in both in<br>shoot and roots may be a molecular marker for plant response to<br>iron (Fe) deficiency stress [109]                                                                                                                         | Λ |       |                  |   |
| 99  | Z-ISO<br>(837626,<br>AT1G10830)                              | ENSVATH04553459:G                 | agatttttatt     | A<br>G    | tagttgtagt                                        | 2.22±0.14<br>2.74±0.17 | ↓ | 4.21  | 10 <sup>-3</sup> | B                                                      | fruit ripening,<br>breaker stage, red-<br>ripe stage, lutein<br>excess, yellow<br>pigment, ethylene<br>deficit, fruit<br>ripening regulator | within plant fruit ripening models using proteom profiling of mature<br>green (MG), breaker (BR) and red-ripe (RR) stages of tomato ( <i>Solanum<br/>lycopersicum</i> ) mutants: SlZ-ISO downregulation in both breaker and<br>red-ripe stages along with excess of lutein as the main yellow pigment<br>and deficit of ethylene as an important regulator of fruit ripening [110] | V |       |                  |   |
|     |                                                              | ENSVATH04553459:T                 | agatttttatt     | A<br>T    | tagttgtagt                                        | 2.22±0.14<br>2.74±0.17 |   |       |                  |                                                        |                                                                                                                                             |                                                                                                                                                                                                                                                                                                                                                                                    |   | 3.15  | 10 <sup>-2</sup> | C |
|     |                                                              | tmp_1_3607591_A_T:A               | gagattttat      | T<br>A    | atagttgtag                                        | 2.22±0.14<br>2.54±0.15 |   |       |                  |                                                        |                                                                                                                                             |                                                                                                                                                                                                                                                                                                                                                                                    |   |       |                  |   |
| 100 | ZKT<br>(841995,<br>AT1G55480)                                | tmp_1_20713462_G_T:T              | cacttgctct      | G<br>T    | aacgttacca                                        | 7.76±0.44<br>4.73±0.22 | ↓ | 13.45 | 10 <sup>-6</sup> | A                                                      | early stress<br>response; high-salt<br>stress, drought<br>stress                                                                            | within plant stress response models using proteome analyses of<br>rapeseed ( <i>Brassica napus</i> ) seedlings pretreated with 245 mM NaCl or<br>25% polyethylene glycol to imitate environment salt and drought<br>stresses: BnZKT upregulation may be a molecular marker for early<br>responses of plants to salt and drought [111]                                              | Λ |       |                  |   |
| 101 | 2A6<br>(838763;<br>AT1G03410)                                | ENSVATH04513629:A                 | ttattttaatt     | G<br>A    | tattaagatg                                        | 2.78±0.18<br>2.49±0.14 | ↑ | 2.55  | 0.05             | D                                                      | ethylene<br>responsiveness                                                                                                                  | according to the identification of this gene for the first time <i>via</i><br>searching for homology to the tomato gene E8 in a cDNA library of<br><i>A. thaliana</i> : 2A6 excess may resist ethylene response in etiolated<br>seedlings, leaves, stems and flowers [112]                                                                                                         | V |       |                  |   |
| 102 | 2-Cys Prx B                                                  | tmp_5_1919025_T_A:A               | tatttgatt       | T         | tcttaattat                                        | 4.39±0.19              | ↑ | 7.51  | 10 <sup>-6</sup> | A                                                      | photosynthetic                                                                                                                              | as an heuristic contrast to plant development models using                                                                                                                                                                                                                                                                                                                         | Λ |       |                  |   |

|                        |                   |             |   |            |           |                  |  |  |  |  |            |                                                                                                                                               |
|------------------------|-------------------|-------------|---|------------|-----------|------------------|--|--|--|--|------------|-----------------------------------------------------------------------------------------------------------------------------------------------|
| (830517;<br>AT5G06290) |                   |             | A |            | 3.34±0.19 |                  |  |  |  |  | efficiency | Arabidopsis thaliana 2-Cys Prx B knockout: 2-Cys Prx B excess may increase photosynthetic efficiency under high-light growth conditions [113] |
|                        | ENSVATH03029898:A | ttttcttaaat | T | attatgattg | 4.39±0.19 |                  |  |  |  |  |            |                                                                                                                                               |
|                        | ENSVATH13940029:C | ttcttaatta  | T | tatgattgga | 4.39±0.19 |                  |  |  |  |  |            |                                                                                                                                               |
|                        |                   |             | A |            | 3.81      | 10 <sup>-3</sup> |  |  |  |  | B          |                                                                                                                                               |
|                        |                   |             | C |            | 3.81±0.28 |                  |  |  |  |  | B          |                                                                                                                                               |

Table S1. Cont.

| #   | <i>A. thaliana</i> gene<br>(Entrez ID [37];<br>TAIR ID [38]) | Candidate SNP marker              |                 |           |                | K <sub>D</sub> , nM, MEAN ± SEM, <i>in silico</i> |   |       |                  |   | Hand-curated annotation using the PubMed database [39] |                                                                                                                                                                                                                                                                                                          |   |
|-----|--------------------------------------------------------------|-----------------------------------|-----------------|-----------|----------------|---------------------------------------------------|---|-------|------------------|---|--------------------------------------------------------|----------------------------------------------------------------------------------------------------------------------------------------------------------------------------------------------------------------------------------------------------------------------------------------------------------|---|
|     |                                                              | TAIR SNP ID [38]: minor<br>allele | 5' flank, 10 bp | WT<br>min | 3 flank, 10 bp | WT<br>min                                         | Δ | Z     | P                | Q | economically<br>valuable traits                        | Effect on this trait ("Y": "Λ" as improved; "V" as impaired) within plant<br>breeding models using <i>Arabidopsis thaliana</i> [Ref]                                                                                                                                                                     | Y |
| 103 | 3BETAHSD/D1<br>(841132;<br>AT1G47290)                        | ENSVATH04886215:T                 | atttataaat      | A<br>T    | taagtattct     | 1.96±0.11<br>2.27±0.13                            | ↓ | 3.63  | 10 <sup>-3</sup> | B | phytosterol<br>overproduction                          | within the framework of a comprehensive experimental and bioinformatic study of the reticulon gene family and the proteins encoded by them: 3BETAHSD/D1 heterozygous mutant lines show increased sterol levels in roots and leaves [114]                                                                 | Λ |
|     |                                                              | ENSVATH01304136:T                 | aaaattaaac      | G<br>T    | aataaattat     | 5.36±0.23<br>4.24±0.19                            |   | 7.65  | 10 <sup>-6</sup> | A |                                                        |                                                                                                                                                                                                                                                                                                          |   |
|     |                                                              | ENSVATH01304139:C                 | gatttcaaaa      | A<br>C    | ataaaaataaa    | 5.36±0.23<br>4.12±0.22                            |   | 7.65  | 10 <sup>-6</sup> | B |                                                        |                                                                                                                                                                                                                                                                                                          |   |
|     |                                                              | ENSVATH0486220:T                  | tttggttgga      | G<br>T    | aaaattaaac     | 5.36±0.23<br>4.72±0.19                            | ↑ | 4.36  | 10 <sup>-3</sup> | A | narrow<br>endoplasmic<br>reticulum                     | within the framework of a comprehensive experimental and bioinformatic study of the reticulon gene family and the proteins encoded by them: 3BETAHSD/D1 excess can narrow the endoplasmic reticulum [114]                                                                                                | V |
|     |                                                              | ENSVATH0486221:T                  | taaacgaata      | A<br>T    | attatgcaat     | 5.36±0.23<br>3.04±0.23                            |   | 13.04 | 10 <sup>-6</sup> | A |                                                        |                                                                                                                                                                                                                                                                                                          |   |
|     |                                                              | ENSVATH14241813:A                 | attcagattt      | C<br>A    | aaaaaataaa     | 5.36±0.23<br>4.19±0.22                            |   | 7.38  | 10 <sup>-6</sup> | A |                                                        |                                                                                                                                                                                                                                                                                                          |   |
|     |                                                              | ENSVATH13402286:G                 | tttataaata      | T<br>G    | aagtattctt     | 1.96±0.11<br>1.80±0.12                            |   | 2.03  | 0.05             | D |                                                        |                                                                                                                                                                                                                                                                                                          |   |
|     |                                                              |                                   |                 |           |                |                                                   |   |       |                  |   |                                                        |                                                                                                                                                                                                                                                                                                          |   |
| 104 | 4CL3<br>(842814;<br>AT1G65060)                               | ENSVATH01466772:A                 | aaaacacgca      | C<br>A    | atttctatat     | 1.90±0.13<br>2.18±0.16                            |   | 2.78  | 10 <sup>-2</sup> | C |                                                        |                                                                                                                                                                                                                                                                                                          |   |
|     |                                                              | ENSVATH13728248:C                 | cacatttcta      | T<br>C    | atattattta     | 1.90±0.13<br>3.09±0.14                            | ↓ | 11.81 | 10 <sup>-6</sup> | A | infection<br>resistance                                | within plant innate immunity models using <i>Arabidopsis thaliana</i> 4cl3-deficient mutants <i>in vivo</i> : improved resistance against <i>Pseudomonas syringae</i> [115]                                                                                                                              | Λ |
|     |                                                              | tmp_1_24171657_T_GC               | ccacacattt      | A<br>C    | tttcttcact     | 4.45±0.24<br>7.32±0.53                            |   | 11.10 | 10 <sup>-6</sup> | A |                                                        |                                                                                                                                                                                                                                                                                                          |   |
|     |                                                              | tmp_1_24171580_G_TA               | acgcacattt      | C<br>A    | tatatattat     | 1.90±0.13<br>1.48±0.08                            | ↑ | 5.71  | 10 <sup>-6</sup> | A | cold tolerance                                         | within plant cold tolerance models using rapeseed subjected with T-DNA insertion carrying homologous <i>A. thaliana</i> 4cl3 gene: improved cold tolerance [116]                                                                                                                                         | V |
| 105 | 4CL5<br>(821677;<br>AT3G21230)                               | ENSVATH00337714:G                 | atggcttata      | T<br>G    | acaaaatcat     | 1.40±0.10<br>3.98±0.29                            | ↓ | 19.96 | 10 <sup>-6</sup> | A | phytomedication                                        | according to a phytopharmaceutical study on how to produce natural phytomedications using super-producing yeasts carrying plant genes: 4cl5 deficiency in plant reduces content of natural avenanthramides with antioxidant, anti-inflammatory, and antiproliferative bioactivities in plant foods [117] | V |

|     |                                 |                            |            |        |            |                        |                            |                                             |                                                                                                                                                                                                                                               |   |
|-----|---------------------------------|----------------------------|------------|--------|------------|------------------------|----------------------------|---------------------------------------------|-----------------------------------------------------------------------------------------------------------------------------------------------------------------------------------------------------------------------------------------------|---|
| 106 | 4CL8<br>(833792;<br>AT5G38120)  | tmp_5_15213636_T_G:G       | agtgaatatt | T<br>G | atagtaaata | 1.64±0.11<br>2.89±0.15 | ↓ 13.21 10 <sup>-6</sup> A | herbal food<br>supplements,<br>coenzyme Q10 | within economically valuable plant breeding models using T-DNA-based 4cl8-knockout <i>Arabidopsis thaliana</i> : compared with wild-type plants, 20% decreased content of ubiquinone, which is the herbal food supplement coenzyme Q10 [118]  | ∨ |
|     |                                 | -----<br>ENSVATH12149211:T | cactaaaata | C<br>T | aaatattcgt | 4.06±0.23<br>2.34±0.15 | ↑ 12.89 10 <sup>-6</sup> A |                                             | -----<br>within economically valuable plant breeding models using T-DNA-based 4cl8-knockin <i>Arabidopsis thaliana</i> : compared with wild-type plants, 50% increased content of ubiquinone as the herbal food supplement coenzyme Q10 [118] | ∧ |
| 107 | 5-FCL<br>(831144;<br>AT5G13050) | ENSVATH03052038:A          | tgtcgtttat | G<br>A | gtttggaata | 5.58±0.29<br>3.23±0.23 | ↑ 12.38 10 <sup>-6</sup> A | growth rate,<br>flowering                   | as a heuristic contrast to the only economically valuable plant trait breeding model using the T-DNA-based 5-fcl knockout <i>Arabidopsis thaliana</i> (ecotype Columbia): increased growth rate and accelerated flower onset [119]            | ∧ |

Table S1. Cont.

| #   | <i>A. thaliana</i> gene<br>(Entrez ID [37];<br>TAIR ID [38]) | Candidate SNP marker              |                 |           |                | K <sub>D</sub> , nM, MEAN±SEM, <i>in silico</i> |   |       |                  |   | Hand-curated annotation using the PubMed database [39]                     |                                                                                                                                                                                                                                                                                                                                                                     |   |
|-----|--------------------------------------------------------------|-----------------------------------|-----------------|-----------|----------------|-------------------------------------------------|---|-------|------------------|---|----------------------------------------------------------------------------|---------------------------------------------------------------------------------------------------------------------------------------------------------------------------------------------------------------------------------------------------------------------------------------------------------------------------------------------------------------------|---|
|     |                                                              | TAIR SNP ID [38]: minor<br>allele | 5' flank, 10 bp | WT<br>min | 3 flank, 10 bp | WT<br>min                                       | Δ | Z     | p                | Q | economically<br>valuable traits                                            | Effect on this trait ("Λ" as improved; "V" as impaired) within plant<br>breeding models using <i>Arabidopsis thaliana</i> [Ref]                                                                                                                                                                                                                                     | Υ |
| 108 | 5PTASE11<br>(841160;<br>AT1G47510)                           | ENSVATH01308444:T                 | tggtttctat      | A<br>T    | tatacaagta     | 1.05±0.10<br>1.49±0.11                          |   | 5.99  | 10 <sup>-6</sup> | A | seed<br>germination,<br>seedling<br>hypocotyl<br>growth                    | within economically valuable plant breeding models using T-DNA-<br>related 5ptase11 loss-of-function <i>Arabidopsis thaliana</i> mutant line Salk<br>(ecotype Columbia): compared with wild-type plants, slowed seed<br>germination and decreased seedling hypocotyl growth [120]                                                                                   | V |
|     |                                                              | ENSVATH04890271:T                 | acgttggttt      | C<br>T    | tatatataca     | 1.05±0.10<br>1.44±0.09                          |   | 5.58  | 10 <sup>-6</sup> | A |                                                                            |                                                                                                                                                                                                                                                                                                                                                                     |   |
|     |                                                              | ENSVATH13411044:G                 | atatatatat      | A<br>G    | tatgaatatt     | 1.18±0.10<br>1.43±0.10                          | ↓ | 3.45  | 10 <sup>-3</sup> | B |                                                                            |                                                                                                                                                                                                                                                                                                                                                                     |   |
|     |                                                              | tmp_1_17438445_T_G:C              | atcaatatat      | A<br>C    | tatatatgaa     | 1.18±0.10<br>1.63±0.13                          |   | 5.50  | 10 <sup>-6</sup> | A |                                                                            |                                                                                                                                                                                                                                                                                                                                                                     |   |
|     |                                                              | ENSVATH07633212:T                 | tatatatatg      | A<br>T    | atattgaaga     | 3.75±0.25<br>3.23±0.24                          |   | 2.97  | 10 <sup>-2</sup> | C | development of<br>flowers, leaves,<br>roots, siliques,<br>bolts, seedlings | within plant auxin response models using Arabidopsis tissues treated<br>with auxin and, next, studied with qPCR: auxin upregulates 5ptase11 in<br>flowers, rosette leaves, cauline leaves, roots, siliques, bolts, and seedlings<br>along with corresponding improvements in their development [121]                                                                | Λ |
|     |                                                              | tmp_1_17438527_G_A:T              | tctttgtagt      | G<br>T    | aacaccattt     | 4.54±0.25<br>3.00±0.21                          | ↑ | 8.84  | 10 <sup>-6</sup> | A |                                                                            |                                                                                                                                                                                                                                                                                                                                                                     |   |
| 109 | 5PTASE13<br>(837069;<br>AT1G05630)                           | ENSVATH10657714:T                 | aaacaaaaac      | A<br>T    | tcggtttttt     | 9.87±0.45<br>10.74±0.47                         |   | 2.70  | 10 <sup>-2</sup> | C | root<br>gravitropism,<br>seed<br>germination,<br>seedling growth           | within economically valuable plant breeding models using 5ptase13-<br>deficient <i>Arabidopsis thaliana</i> line 5pt13 (ecotype Columbia): root<br>gravitropism hypersensitivity, extended expression of the auxin efflux<br>carrier PIN2, resistance to inhibitors of both seedling growth and<br>intracellular circulation of PIN proteins [122]                  | Λ |
|     |                                                              | tmp_1_1682324_A_G:G               | tcgtcttcat      | A<br>G    | tttctctctc     | 6.94±0.36<br>9.25±0.68                          | ↓ | 6.40  | 10 <sup>-6</sup> | A |                                                                            |                                                                                                                                                                                                                                                                                                                                                                     |   |
|     |                                                              | ENSVATH04525467:A                 | tctcaacttt      | G<br>A    | actgcgtctt     | 9.87±0.45<br>5.06±0.28                          |   | 18.70 | 10 <sup>-6</sup> | A | root growth,<br>low-nutrient<br>conditions                                 | within economically valuable plant breeding models using 5ptase13-<br>deficient <i>Arabidopsis thaliana</i> line transfected with vector carrying an<br>additional normal copy of this gene: improved root growth as an additive<br>complementation to the initializing 5ptase13-deficient plant with<br>decreased root growth at the low-nutrient conditions [123] | Λ |
|     |                                                              | ENSVATH10657775:A                 | aacaaaaaca      | T<br>A    | tcggtttttt     | 9.87±0.45<br>9.02±0.41                          | ↑ | 2.79  | 10 <sup>-2</sup> | C |                                                                            |                                                                                                                                                                                                                                                                                                                                                                     |   |

**Table S2.** Significant correlations between *in silico* estimates of the equilibrium dissociation constant  $K_D$  of an arbitrary plant TBP-promoter complexes, which were documented within the AtSNP\_TATAdb database [this work], on one side and strength values of the same promoters, which were independently experimentally measured *in vivo* [125], on another side that are robust to variations in statistical criteria examined, genomic environments and plant species under study as well as their tissues and growing conditions.

| AtSNP_TATAdb [this work]                              |                                    | Promoter strength (log <sub>2</sub> -values; normalized to the 35S minimal promoter), <i>in vivo</i> magnitudes [125] |                    |                                    |                                      |                                   |                                     |                                      |                                        |
|-------------------------------------------------------|------------------------------------|-----------------------------------------------------------------------------------------------------------------------|--------------------|------------------------------------|--------------------------------------|-----------------------------------|-------------------------------------|--------------------------------------|----------------------------------------|
| #                                                     | Transcript, Ensembl Plants ID [31] | $K_D$ , nM, <i>in silico</i>                                                                                          | Gene, TAIR ID [38] | no enhancer, tobacco leaves, light | with enhancer, tobacco leaves, light | no enhancer, tobacco leaves, dark | with enhancer, tobacco leaves, dark | no enhancer, maize protoplasts, dark | with enhancer, maize protoplasts, dark |
| 1                                                     | EMB3101-201                        | 3.35                                                                                                                  | AT1G05600          | -0.69                              | -1.02                                | -1.02                             | -0.31                               | -3.92                                | -2.29                                  |
| 2                                                     | NGA3-201                           | 2.52                                                                                                                  | AT1G01030          | -2.03                              | -0.19                                | -1.35                             | -0.56                               | -1.94                                | -1.08                                  |
| 3                                                     | IQD18-201                          | 1.85                                                                                                                  | AT1G01110          | -1.03                              | 1.99                                 | -0.81                             | 2.58                                | -1.58                                | 0.18                                   |
| 4                                                     | AT1G01130-201                      | 6.08                                                                                                                  | AT1G01130          | -2.56                              | 0.52                                 | -1.85                             | 0.98                                | -2.83                                | -0.51                                  |
| 5                                                     | GIF2-201                           | 2.93                                                                                                                  | AT1G01160          | -1.42                              | 1.22                                 | -1.91                             | 0.86                                | -3.11                                | -2.37                                  |
| 6                                                     | CYP78A8-202                        | 3.56                                                                                                                  | AT1G01190          | 0.62                               | 3.64                                 | -2.61                             | 4.02                                | -0.42                                | 1.33                                   |
| 7                                                     | FKGP-204                           | 5.21                                                                                                                  | AT1G01220          | -2.86                              | 0.01                                 | -1.63                             | 0.92                                | -3.03                                | -1.75                                  |
| 8                                                     | AT1G01225-201                      | 4.88                                                                                                                  | AT1G01225          | -3.07                              | 0.92                                 | -2.99                             | 1.00                                | -3.05                                | -2.12                                  |
| 9                                                     | AT1G01230-201                      | 4.18                                                                                                                  | AT1G01230          | -2.28                              | 1.33                                 | -1.70                             | 1.06                                | -3.36                                | -2.31                                  |
| 10                                                    | AT1G01240-201                      | 6.24                                                                                                                  | AT1G01240          | -2.22                              | -1.22                                | -1.15                             | -0.17                               | -2.68                                | -1.90                                  |
| 11                                                    | AT1G01260-201                      | 4.89                                                                                                                  | AT1G01260          | -1.79                              | 0.32                                 | -1.14                             | 0.28                                | -2.80                                | -1.41                                  |
| 12                                                    | AT1G01355-201                      | 5.44                                                                                                                  | AT1G01355          | -1.77                              | 2.39                                 | -1.56                             | 2.42                                | -2.32                                | -0.89                                  |
| 13                                                    | HTR12-201                          | 2.85                                                                                                                  | AT1G01370          | -2.74                              | -0.86                                | -2.35                             | -1.01                               | -3.34                                | -2.28                                  |
| 14                                                    | AT1G01440-201                      | 2.17                                                                                                                  | AT1G01440          | -1.25                              | 2.37                                 | -2.36                             | 1.99                                | -2.27                                | 0.60                                   |
| 15                                                    | AT1G01500-201                      | 4.50                                                                                                                  | AT1G01500          | -0.13                              | 1.08                                 | -1.51                             | 1.23                                | -2.43                                | -0.75                                  |
| 16                                                    | AGL28-201                          | 1.72                                                                                                                  | AT1G01530          | -1.15                              | 3.06                                 | 0.32                              | 3.94                                | -2.83                                | -0.28                                  |
| 17                                                    | AT1G01540-201                      | 1.56                                                                                                                  | AT1G01540          | 0.20                               | 3.53                                 | 0.01                              | 3.30                                | -2.32                                | 0.75                                   |
| 18                                                    | BPS1-201                           | 3.55                                                                                                                  | AT1G01550          | -0.18                              | 0.44                                 | 0.28                              | 0.29                                | -1.78                                | -1.00                                  |
| 19                                                    | AT1G01640-201                      | 4.00                                                                                                                  | AT1G01640          | -1.77                              | 2.99                                 | -2.07                             | 2.99                                | -1.83                                | -0.25                                  |
| 20                                                    | SPPL4-201                          | 3.80                                                                                                                  | AT1G01650          | -2.05                              | 1.02                                 | 0.81                              | 2.07                                | -1.85                                | -0.59                                  |
| 21                                                    | AT1G01670-201                      | 2.90                                                                                                                  | AT1G01670          | -1.39                              | 2.50                                 | -1.11                             | 2.61                                | -1.93                                | -0.76                                  |
| 22                                                    | PRD3-201                           | 1.86                                                                                                                  | AT1G01690          | 0.56                               | 1.65                                 | -1.03                             | 1.41                                | -1.77                                | -0.27                                  |
| 23                                                    | AT1G01730-201                      | 10.49                                                                                                                 | AT1G01730          | -2.76                              | -0.35                                | -2.74                             | -0.17                               | -3.49                                | -1.27                                  |
| 24                                                    | AT1G01760-202                      | 9.61                                                                                                                  | AT1G01760          | -2.25                              | -1.06                                | -2.31                             | -0.64                               | -1.43                                | -0.10                                  |
| 25                                                    | AT1G01770-201                      | 1.08                                                                                                                  | AT1G01770          | -2.64                              | 1.56                                 | -1.67                             | 1.26                                | -2.67                                | -1.48                                  |
| 26                                                    | PLIM2b-201                         | 2.12                                                                                                                  | AT1G01780          | 0.05                               | 1.51                                 | -0.18                             | 1.40                                | -1.80                                | 0.42                                   |
| 27                                                    | PEX11C-201                         | 4.45                                                                                                                  | AT1G01820          | -1.54                              | 1.78                                 | -1.79                             | 2.27                                | -3.17                                | -1.94                                  |
| 28                                                    | AT1G01830-203                      | 1.77                                                                                                                  | AT1G01830          | -2.34                              | 0.86                                 | -2.22                             | 1.68                                | -2.71                                | -0.54                                  |
| 29                                                    | EDA10-201                          | 7.07                                                                                                                  | AT1G01960          | -2.14                              | 1.20                                 | -1.99                             | 0.65                                | -3.47                                | -2.88                                  |
| 30                                                    | GAE2-201                           | 2.37                                                                                                                  | AT1G02000          | -2.51                              | 0.93                                 | -2.49                             | 0.89                                | -3.45                                | -2.38                                  |
| 31                                                    | VAD1-201                           | 7.14                                                                                                                  | AT1G02120          | -2.56                              | -2.33                                | -3.34                             | -1.05                               | -7.29                                | -5.50                                  |
| 32                                                    | AT1G02150-201                      | 5.53                                                                                                                  | AT1G02150          | -2.32                              | 1.10                                 | -2.33                             | 1.76                                | -3.82                                | -0.72                                  |
| 33                                                    | AT1G02160-201                      | 1.71                                                                                                                  | AT1G02160          | -0.71                              | 1.49                                 | -0.42                             | 2.62                                | -2.34                                | -0.32                                  |
| 34                                                    | NAC004-201                         | 2.10                                                                                                                  | AT1G02230          | 2.77                               | 2.43                                 | 2.17                              | 2.92                                | -2.42                                | -0.24                                  |
| 35                                                    | TOC33-201                          | 3.03                                                                                                                  | AT1G02280          | -0.23                              | 0.92                                 | -0.69                             | 1.62                                | -3.41                                | -1.63                                  |
| 36                                                    | MAN1-202                           | 4.03                                                                                                                  | AT1G02310          | -1.94                              | 1.14                                 | -1.55                             | 1.46                                | -2.93                                | -1.89                                  |
| 37                                                    | AT2G01060-201                      | 6.94                                                                                                                  | AT2G01060          | -2.69                              | -0.37                                | -3.47                             | -0.20                               | -3.12                                | -1.15                                  |
| 38                                                    | AT2G14700-201                      | 2.12                                                                                                                  | AT2G14700          | -2.51                              | 1.73                                 | -1.17                             | 2.28                                | -2.18                                | 0.50                                   |
| 39                                                    | AT2G20250-201                      | 3.41                                                                                                                  | AT2G20250          | 3.99                               | 3.98                                 | 1.53                              | 3.91                                | -0.76                                | 0.99                                   |
| 40                                                    | AT2G40004-201                      | 1.19                                                                                                                  | AT2G40004          | -1.46                              | 2.60                                 | -1.30                             | 2.90                                | -1.23                                | 0.29                                   |
| 41                                                    | RGF4-201                           | 3.21                                                                                                                  | AT3G30350          | -1.82                              | 1.37                                 | -1.19                             | 1.83                                | -3.83                                | -2.69                                  |
| 42                                                    | AT3G42850-201                      | 4.45                                                                                                                  | AT3G42850          | -1.07                              | 0.69                                 | -1.72                             | 1.21                                | -2.65                                | -1.10                                  |
| 43                                                    | AT3G49950-201                      | 3.96                                                                                                                  | AT3G49950          | -1.58                              | -0.48                                | -2.69                             | 0.65                                | -2.36                                | -1.62                                  |
| 44                                                    | SAP130b-201                        | 2.95                                                                                                                  | AT3G55220          | -1.75                              | 1.07                                 | -2.38                             | 0.61                                | -4.30                                | -2.02                                  |
| 45                                                    | AT4G10110-201                      | 4.77                                                                                                                  | AT4G10110          | -2.87                              | -0.57                                | -4.81                             | -0.15                               | -4.11                                | -3.30                                  |
| 46                                                    | AT4G22110-202                      | 2.25                                                                                                                  | AT4G22110          | -0.18                              | 1.70                                 | -0.85                             | 1.79                                | -2.44                                | -0.88                                  |
| 47                                                    | AT4G40000-201                      | 3.88                                                                                                                  | AT4G40000          | -1.17                              | 1.81                                 | -0.51                             | 1.94                                | -2.67                                | -0.64                                  |
| 48                                                    | AT5G11700-201                      | 5.08                                                                                                                  | AT5G11700          | -2.56                              | -1.11                                | -2.59                             | -0.97                               | -3.20                                | -1.67                                  |
| 49                                                    | GolS10-201                         | 5.96                                                                                                                  | AT5G30500          | -0.78                              | 1.93                                 | 0.36                              | 2.65                                | -0.86                                | 1.47                                   |
| 50                                                    | AT5G52800-201                      | 9.20                                                                                                                  | AT5G52800          | -1.73                              | -0.52                                | -1.42                             | -0.46                               | -3.84                                | -3.05                                  |
| Pearson's linear correlation, r (p)                   |                                    |                                                                                                                       |                    | -0.36 (0.025)                      | -0.54 (0.00005)                      | -0.37 (0.01)                      | -0.52 (0.00025)                     | -0.30 (0.05)                         | -0.34 (0.025)                          |
| Spearman's rank correlation, R (p)                    |                                    |                                                                                                                       |                    | -0.43 (0.0025)                     | -0.53 (0.0001)                       | -0.42 (0.0025)                    | -0.50 (0.00025)                     | -0.35 (0.025)                        | -0.38 (0.01)                           |
| Kendall's rank correlation, $\tau$ (p)                |                                    |                                                                                                                       |                    | -0.30 (0.0025)                     | -0.38 (0.0001)                       | -0.29 (0.005)                     | -0.36 (0.00025)                     | -0.25 (0.025)                        | -0.24 (0.025)                          |
| Goodman-Kruskal generalized correlation, $\gamma$ (p) |                                    |                                                                                                                       |                    | -0.30 (0.0025)                     | -0.38 (0.0001)                       | -0.29 (0.005)                     | -0.36 (0.00025)                     | -0.25 (0.025)                        | -0.24 (0.025)                          |

**Notes.** See Notes under Table S1.

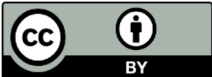

© 2024 by the authors. Submitted for possible open access publication under the terms and conditions of the Creative Commons Attribution (CC BY) license (<http://creativecommons.org/licenses/by/4.0/>).
